1 Article

# 2 Gut Mycobiome Dysbiosis is Linked to Hypertriglyceridemia 3 Among Home Dwelling Elderly Danes

4 Hajar Fauzan Ahmad<sup>1,2</sup>, Josue Leonardo Castro Mejia<sup>1</sup>, Lukasz Krych<sup>1</sup>, Bekzod Khakimov<sup>1</sup>, Witold Kot<sup>3</sup>, Rasmus  
5 Leidesdorff Bechshøft<sup>4</sup>, Søren Reitelseder<sup>4</sup>, Grith Westergaard Højfeldt<sup>4</sup>, Søren Balling Engelsen<sup>1</sup>, Lars Holm<sup>5</sup>, and  
6 Dennis Sandris Nielsen<sup>1\*</sup>

7

8 <sup>1</sup> Department of Food Science, Faculty of Science, University of Copenhagen, Frederiksberg, Denmark.; HFA  
9 - fauzanahmad@ump.edu.my ; JLC - jcame@food.ku.dk ; ŁK - krych@food.ku.dk ; BK - bzo@food.ku.dk ;  
10 SBE - se@food.ku.dk ; DSN - dn@food.ku.dk  
11 <sup>2</sup> Faculty of Industrial Sciences and Technology, Department of Industrial Biotechnology, Universiti Malaysia  
12 Pahang, Pahang, Malaysia.; HFA - fauzanahmad@ump.edu.my  
13 <sup>3</sup> Department of Environmental Science, Aarhus University, Roskilde, Denmark.; WK - wk@envs.au.dk  
14 <sup>4</sup> Institute of Sports Medicine Copenhagen, Department of Orthopedic Surgery M, Bispebjerg Hospital, Co-  
15 penhagen Denmark.; RLB - r.bechshoeft@gmail.com ; SR - s.reitelseder@gmail.com ; GWH-  
16 grith.westergaard.hoejfeldt.01@regionh.dk  
17 <sup>5</sup> School of Sport, Exercise and Rehabilitation Sciences, University of Birmingham, Birmingham, United  
18 Kingdom ; LH - l.holm@bham.ac.uk  
19 \* Correspondence: HFA - fauzanahmad@ump.edu.my ; DSN - dn@food.ku.dk

20

21 **Abstract:** Gut microbial dysbiosis have been linked to frailty in elderly, yet the presence of fungal communities  
22 and their possible association with host health are little understood. This study attempts to identify gut mi-  
23 crobial fungal associations with the progression of atherogenic dyslipidemia in a population of older adults  
24 by investigating the interplay between dietary intake, gut mycobiome composition, plasma and fecal  
25 metabolome and anthropometric/body-composition measurements of 99 Danes aged 65 to 81 ( $69.57 \pm 3.64$ )  
26 years. The gut mycobiome composition were determined by high-throughput sequencing of internal tran-  
27 scribed spacer (ITS2) gene amplicons, while the plasma and fecal metabolome was determined by GC-MS.  
28 The gut microbiome of the subjects investigated is home to three main eukaryotic phyla, namely Ascomyco-  
29 ta, Basidiomycota and Zygomycota, with genera *Penicillium*, *Candida*, and *Aspergillus* being particularly  
30 common. Hypertriglyceridemia was associated with fewer observed fungal species, and Bray-Curtis dissim-  
31 ilarity matrix-based analysis showed significant ( $p < 0.05$ ) clustering according to fasting levels of circulating  
32 plasma triglycerides (Tg) and very low-density lipoprotein (VLDL) cholesterol fasting levels, respectively.  
33 Higher levels of Tg and VLDL cholesterol significantly associates with increased relative abundance of ge-  
34 nus *Penicillium*, and *Saccharomyces* likely mediated by a higher dietary fatty acids intake ( $p < 0.05$ ), and *Sac-*  
35 *charomyces*, *Debaryomyces*, *Candida*, *Agaricus* and *Starmerella* were moderately associated with SCFAs groups.  
36 Collectively, these findings suggest that gut mycobiome dysbiosis on older adults is associated with hyper-  
37 triglyceridemia, a known risk factor for development of cardiovascular disease.

38 **Keywords:** older-adults; hypertriglyceridemia; dysbiosis; gut mycobiome; metabolome; triglycer-  
39 ide; VLDL; short-chain fatty acids; and diet.

40

## 41 1. Introduction

42 Age is known as a dominant cardiovascular disease (CVD) risk factor in both  
43 older men and women, including other multiple disorders such as atherosclerosis [1],  
44 obesity [2], hypertension [3], dyslipidaemia [4], and hypertriglyceridemia [5]. Despite  
45 the close association with genetics and other health disorders, the interactions be-

46           tween nutrition and gut microbiome are increasingly recognised for their contribution  
47           to CVD development [6], [7]. Gut microbiota (GM) dysbiosis has previously been found  
48           to be associated with frailty in elderly people as well as being a risk factor for metabol-  
49           ic disorders [8]–[13] and other diseases like cancers [14], [15]. Thus, maintaining a di-  
50           verse core gut microbiome has been proposed as a possible approach for embracing  
51           healthy ageing [16]–[18].

52                        Research on the GM of elderly has primarily focused on the bacterial compo-  
53                        nents, largely ignoring fungi, archaea and viruses [10], [19]. Previous studies have  
54                        characterized human gut fungal communities from diverse age groups [20]–[23]. The  
55                        fungal component of the gut microbiome of healthy individuals has been reported to  
56                        be dominated by *Saccharomyces*, *Malassezia*, and *Candida* [21], [24], [25]. Moreover,  
57                        colonisation of opportunistic fungal pathogens in the gut can induce dysregulation  
58                        of host immune responses thereby influencing the disease prognosis. Recent studies  
59                        show that fungi have significant effects in the gut milieu despite their small proportion  
60                        in number as compared to bacteria [26]. Gut mycobiome dysbiosis; which refer to an  
61                        imbalance microbial community composition, including symbiont loss, pathobiont or  
62                        opportunist outgrowth, altered inter-microbial competition, and disturbed microbial  
63                        diversity of the gut mycobiota, has been associated with irritable bowel syndromes  
64                        [27], autoimmune [28], obesity [22], cancers and carotid atherosclerosis [29]. Howev-  
65                        er, the role of the gut mycobiome in developing hypertriglyceridemia among the age-  
66                        ing population has often been neglected.

67                        To date, the best-known mechanism by which the elevation of triglycerides  
68                        (Tg) and very low density level (VLDL) cholesterol levels have been associated with  
69                        subclinical atherosclerosis and dubbed as independent risk factors for CVD [30]. Sever-  
70                        al large studies suggest that hypertriglyceridemia due to increased Tg levels is related  
71                        to increased levels of remnant lipoproteins in promoting atherogenesis [31], [32]. Pre-  
72                        vious study shown that high-fat diet feeding result in an increased proportion of lipo-  
73                        polysaccharide-containing microbiota in the gut [33] and involved in secreting and syn-  
74                        thesizing bioactive metabolites that affect the accumulation of postprandial lipopro-  
75                        tein [34]. Inevitably, the microbial metabolites are transferred to distant sites through  
76                        blood circulation system and influence the occurrence of hypertriglyceridemia [35]–  
77                        [37].

78                        Currently, a high-throughput sequencing approach is becoming important for  
79                        studying complex microbial community in various ecological setting, and capable to  
80                        sequence thousands to millions of base pairs in a short period by targeting 18S rRNA,  
81                        ITS1 or/and ITS2 [38], [39]. The recent effort in improving sequencing methods and da-

82 tabases, it is feasible now to describe the non-culturable fungal populations [40].  
83 Here, we comprehensively explored the gut fungal composition, dietary intake,  
84 plasma metabolome, and anthropometric/body-composition measurements among  
85 older adult Danes that associated to hypertriglyceridemia. We observed that the fe-  
86 cal mycobiome dysbiosis is strongly associated with elevated of Tg and VLDL choles-  
87 terol levels. Collectively, these findings provide a new insight for a noninvasive ap-  
88 proach in diagnosis and predicting hypertriglyceridemia, and suggest that manipula-  
89 tion of gut mycobiome communities might be a novel target in the treatment of ath-  
90 erosclerotic CVD in the near future among the elderly.

## 91 **2. Materials and Methods**

### 92 ***2.1 Study Design and Participants Recruitment***

93 Participants for this study consisted of 99 elderly Danes from the Counteract-  
94 ing Age-related Loss of skeletal Muscle mass (CALM) cohort that recruited in the Great-  
95 er Copenhagen area through local newspapers, magazines, radio programs, social me-  
96 dia, and presentations at senior centers and public events. The details about the inclu-  
97 sion criteria has been described elsewhere [41]. All experiments were performed in ac-  
98 cordance with the Declaration of Helsinki II and approved by The Danish Regional  
99 Committees of the Capital Region (number H-4-2013-070) and with informed consent  
100 from all participants, registered at ClinicalTrials.gov (NCT02034760). All data are pro-  
101 tected under Danish Data Protection Agency 2012-58-0004 – BBH-2015-001 I-Suite.

102

### 103 ***2.2 Sample Collection and Processing***

104 After the recruitment, every participant will deliver the fecal samples in an insu-  
105 lated bag with freezing elements to Bispebjerg Hospital, Copenhagen, Denmark, within  
106 24 hours and stored at -60 °C until further analysis. Prior homogenisation, the raw fecal  
107 samples were thawed at 4 °C, resuspended in autoclaved Milli-Q water (1:2 feces/water)  
108 for 1 min at high speed (Lab Seward, BA7021). The homogenized fecal samples were  
109 aliquoted in 2 mL vials for usage in this study. For gut microbiome characterization, 200  
110 mg of the fecal pellet was recovered for DNA extraction using the standard protocol  
111 from the PowerSoil® DNA Isolation Kit (MOBIO Laboratories, Carlsbad, CA, USA) sup-  
112 plemented with a bead beating step (FastPrep) to enhance cell lysis. Quality and con-  
113 centration of isolated DNA was measured using NanoDrop 1000 Spectrophotometer  
114 (Thermo-Fisher, DE, USA), and was stored at -20 °C until later use.

115

116 **2.3 The internal Transcribed Spacer 2 (ITS2) Amplification and Sequencing**

117 The gut mycobiome composition was determined using Illumina MiSeq  
118 amplicon-based sequencing of ITS2 gene regions with adapters compatible for the  
119 Nextera Index Kit® (Illumina, CA, USA). For the library preparation, the primers ITS3\_F:  
120 5'- TCG TCG GCA GCG TCA GAT GTG TAT AAG AGA CAG GCA TCG ATG AAG AAC GCA GC -  
121 3' and ITS4\_R: 5'- GTC TCG TGG GCT CGG AGA TGT GTA TAA GAG ACA GTC CTC CGC TTA  
122 TTG ATA TGC -3' [38] were used to cover ITS2 regions. While the first polymerase chain  
123 reaction (PCR) was performed on a SureCycler 8800 (Agilent Technologies, Santa Clara,  
124 USA) using the following temperature profile: denaturation at 95 °C for 5 min; 33 cycles  
125 of 95 °C for 20 s, 56 °C for 30 s and 68 °C for 45 s; followed by final elongation at 68 °C  
126 for 5 min, the barcoding was performed at 98 °C for 1 min; 12 cycles of 98 °C for 10 s, 55  
127 °C for 20 s and 72 °C for 20 s; elongation at 72 °C for 5 min during the second step of  
128 PCR. Amplicon concentrations was determined using Qubit® dsDNA BR Assay Kit (Life  
129 Technologies, CA, USA) using a Varioskan Flash Multimode Reader (Thermo Fischer Sci-  
130 entific, MA, USA) at 485/530 nm. Samples were pooled in equimolar concentrations and  
131 sequenced on a MiSeq platform (Illumina, CA, USA) using the V3, 2x250bp MID pair-  
132 ended kit chemistry.

133 **2.4 Analysis of High-throughput Amplicon Sequencing**

134 The raw paired-end reads of ITS2 amplicons data were adapter-trimmed and  
135 overlapped using fastp v0.21 [42]. Forward and reverse primer sequences at the 5' and  
136 3' ends of the merged reads were removed, respectively, using cutadapt v1.18 [43]. The  
137 merged and primer-trimmed reads were denoised with dada2 [44] within the QIIME2  
138 v.2021.4 [45]. The ITS2 sequences were searched against the NCBI Fungal ITS database  
139 [40] followed by consensus-based classification using the QIIME2 v2021.4 classify-  
140 consensus-blast pipeline [45]. Both ASV table and taxonomic classification table were  
141 exported using QIIME2 tools into tab-separated values (.tsv format) and manually for-  
142 matted to generate MicrobiomeAnalyst-compatible input [46] with minor modifications  
143 [39].

144  
145 **2.4 Clinical Parameters, and Metabolome Data**

146 Phenotypic and blood clinical parameters, short-chain fatty acids (SCFAs), 3-days  
147 weighted dietary records have been reported previously [47]. These data were used to  
148 associate with the gut mycobiome component in the present study.

150

## 2.5 Bioinformatics and Statistical Analysis

151

152

153

154

155

156

157

158

159

160

The amplicon data was statistically analyzed using the Marker-gene Data Profiling (MDP) module in MicrobiomeAnalyst [46], [48]. In brief, the Amplicon Sequence Variant (ASV) table, taxonomy table, and metadata were uploaded to the server. The features were filtered using a 20% prevalence mean and 10% variance based on the interquartile range before being normalized using cumulative sum scaling (CSS) [49]. Alpha diversity was measured based on the Chao1 and observed species number metrics with a T-test statistical test, while beta diversity was calculated using analysis of similarities (ANOSIM) based Bray-Curtis distance index, with  $p < 0.05$  deemed significant. Following that, EVenN was used to construct Venn diagrams and networks of the core microbiome to depict the shared core mycobiome amongst groups [50].

161

162

163

164

165

166

167

168

169

170

171

172

173

174

175

176

For multivariate analysis, the correlation between the relative abundance of fungi at genus level and variables ([mycobiome and macronutrients], and [mycobiome and metabolites]) on data (hypertriglyceridemia and normal Tg levels) was predicted using Principle Component Analysis (PCA) biplot and correlation heatmap from *factoextra* version 1.0.7 (<https://github.com/kassambara/factoextra/>) and *GGally* version 2.1.2 (<https://github.com/ggobi/ggally>) from, respectively with minor modifications [51]. The significance of Pearson correlation coefficients greater than 0.5 was analyzed by using a two-sided Pearson correlation test with `cor.test` function at a significance level of 0.05. The significant analyses for macronutrients and metabolites datasets were selected to visualize their distribution between two groups of individuals using boxplots from the *ggplot* package. All the above statistical analysis was performed using R statistical software version 4.2.0. A two-tailed one-sample T-test was carried out to examine the significance of macronutrients and metabolites towards the study group *via* GraphPad Prism version 9.4.1 (GraphPad Software, San Diego, California USA). For all statistical tests, unless stated otherwise, a value of  $p < 0.05$  was considered as statistically significant.

177

## 3. Results

178

### 3.1 Clinical Characteristics of Healthy Older Danish

179

180

181

182

183

184

In this study, a total of 99 home-dwelling rather sedentary elderly Danes above the age of 65 years without any known diseases were enrolled in the CALM study [41]. At baseline, the blood parameters and anthropometric measurements were determined in order to access the trajectory in healthy ageing among older persons. Generally, all the participants had no systemic disease, did not receive any treatment with drugs that affected glucose and lipid metabolisms, nor did they take antibiotics [41]. In this study

185 we stratified the participants according to a newly proposed cut-off of fasting Tg levels;  
 186 Tg > 1.70 mmol/l among the elderly [52], [53] defining a group of blood plasma hyper-  
 187 triglyceridemia (Hypertriglyceridemia, N = 30) and a normotriglyceridemia (Normal Tg, N  
 188 = 69). Here, Hypertriglyceridemiagroup displayed the typical features of these pheno-  
 189 types in comparison with NG group, such as significantly higher BMI ( $p = 0.003$ ), higher  
 190 blood pressure; diastolic ( $p = 0.05$ ), higher lipid profiles; total cholesterol ( $p = 0.001$ ),  
 191 HDL ( $p < 0.001$ ), LDL ( $p = 0.02$ ), and VLDL ( $p = 0.001$ ), and glucose metabolism; OGTT ( $p =$   
 192  $0.009$ ), Hemoglobin A1c ( $p = 0.021$ ), and Proinsulin C-peptide ( $p < 0.001$ ) when com-  
 193 pared using Welch t-test. Nevertheless, age and fasting glucose did not present signifi-  
 194 cant differences between the Hypertriglyceridemia and Normal Tg groups (Table 1).

195 **Table 1.** Demographics of the study participants.

| Features                              | Overall        | Normal Tg Group | Hypertriglyceridemia Group | $p$ -value |
|---------------------------------------|----------------|-----------------|----------------------------|------------|
| <b>Sample size</b>                    | N = 99         | N = 69          | N = 30                     | -          |
| Age (years)                           | 69.57 ± 3.64   | 69.27 ± 3.48    | 70.27 ± 3.94               | 0.106      |
| BMI (kg/cm <sup>3</sup> )             | 25.43 ± 3.45   | 24.81 ± 3.29    | 26.87 ± 3.43               | 0.003*     |
| <b>Blood pressure</b>                 |                |                 |                            |            |
| Systolic (mmHg)                       | 143.37 ± 19.74 | 142.86 ± 21.37  | 144.57 ± 15.54             | 0.347      |
| Diastolic (mmHg)                      | 84.95 ± 10.74  | 83.79 ± 10.03   | 87.67 ± 11.97              | 0.050*     |
| <b>Blood Lipid profiles (mmol/L)</b>  |                |                 |                            |            |
| Total cholesterol                     | 5.72 ± 0.93    | 5.54 ± 0.89     | 6.14 ± 0.91                | 0.001*     |
| HDL-cholesterol                       | 1.80 ± 0.49    | 1.92 ± 0.46     | 1.50 ± 0.43                | <0.001*    |
| LDL-cholesterol                       | 3.23 ± 0.90    | 3.12 ± 0.86     | 3.53 ± 0.96                | 0.020*     |
| VLDL-cholesterol                      | 0.66 ± 0.30    | 0.51 ± 0.14     | 1.04 ± 0.24                | <0.001*    |
| Fasting Tg                            | 1.50 ± 0.76    | 1.11 ± 0.30     | 2.43 ± 0.72                | 0.080      |
| <b>Blood Glucose Profile (mmol/L)</b> |                |                 |                            |            |
| Fasting glucose                       | 5.41 ± 0.51    | 5.37 ± 0.43     | 5.51 ± 0.59                | 0.115      |
| OGTT 120 glucose                      | 6.75 ± 1.63    | 6.50 ± 1.60     | 7.35 ± 1.57                | 0.009*     |
| Haemoglobin A1c                       | 35.6 ± 3.15    | 35.19 ± 3.21    | 36.57 ± 2.81               | 0.021*     |
| Proinsulin C-peptide (pmol/L)         | 707 ± 278      | 623.27 ± 213    | 916.46 ± 314               | <0.001*    |

196 Notes \*  $p$ -values are from Welch t-tests for continuous variables, between two groups of Tg levels. Tab  $p$  - values <  
 197 0.05 considered significant. Abbreviations; BMI – Body Mass Index, HDL – High Density Lipoprotein, LDL – Low  
 198 Density Lipoprotein, VLDL – Very Low Density Lipoprotein, Tg – Triglycerides, and OGTT – Oral Glucose Tolerance  
 199 Test

### 200 **3.2 Fungal Community Composition and Diversity in Hypertriglyceridemia and Normal** 201 **Tg Groups**

202 Overall, a total of 99 fastq files were generated from Illumina Miseq sequencing  
 203 and obtained 7,830,381 high-quality ITS2 sequence reads, with an average of 79,094

204 reads per sample (min = 2832, max = 481718). The mapped sequence reads yielded  
205 1712 ASVs belonging to 3 phyla, 16 classes, 35 orders, 54 families, 82 genera, and 104  
206 fungal species. It is important to note that the sample size for each analysis may vary  
207 owing to missing data in certain parameters (VLDL levels, macronutrients, metabolites),  
208 as a consequence of individuals dropping out of the study.

209 The taxonomy bar plots revealed that *Ascomycota* dominated both hyper-  
210 triglyceridemia (n=30) and normal Tg (n= 69) groups, accounting for 96% and 99% of to-  
211 tal ASVs, respectively (Figure 1A). Both groupings mainly consisted of *Penicillium*, *Sac-*  
212 *charomyces*, *Geotrichum*, and unclassified *Ascomycota* at the genus level (Figure 1B).  
213 *Penicillium* had the highest proportion in hypertriglyceridemia, contributing to 54.7% of  
214 total fungi abundance, followed by 20.7% of *Saccharomyces*. Meanwhile, the normal Tg  
215 group included more *Saccharomyces* (31.7%) and *Geotrichum* genera (30%), accompa-  
216 nied by various fungal genera in minor abundance. Additional information regarding  
217 fungi composition can different taxonomy levels can be found in the supplementary sec-  
218 tion (Figure S1, Table S1).

219 The alpha and beta diversity measured the fungal diversity within and between  
220 the communities, respectively. The richness of fungi communities was significantly  
221 higher in normal Tg than in hypertriglyceridemia, as evidenced by observed species  
222 number and Chao1 estimator in alpha diversity analysis (both  $p=0.0123$ , T-test= -2.5671;  
223 Figure 1C). In addition, the ANOSIM-based Bray-Curtis distance index in beta diversity  
224 analysis indicated significant differences in fungal population between hypertriglyc-  
225 eridemia and normal Tg groups ( $p < 0.008$ , [ANOSIM]R=0.1049). The differences be-  
226 tween the fungal communities in two different groups were illustrated in the principal  
227 coordinate analysis (PCoA) 3D plot (Figure 1D). On the other hand, the clustering analy-  
228 sis highlighted the distribution pattern of the fungal genus based on the Pearson corre-  
229 lation coefficient. According to the bar plot, *Pichia*, *Kurtzmaniellahia*, *Cophinforma*, *Tau-*  
230 *sonia*, *Clavispora*, *Hanseniaspora*, *Saccharomyces*, *Teunomyces*, and *Agaricus* genera  
231 found abundant in normal Tg levels, whereas *Penicillium* was moderately correlated  
232 with hypertriglyceridemia (Figure S3). The differential abundance analysis of the me-  
233 tagenomeSeq model with zero-inflated Gaussian distributions revealed that *Penicillium*  
234 was significantly prevalent in hypertriglyceridemia (p-value=0.001, FDR= 0.006314; Fig-  
235 ure 1E), whereas *Pichia* (p-value= $1.68e^{-12}$ , FDR= $2.65e^{-11}$ ) and *Saccharomyces* (p-  
236 value=0.005, FDR=0.012) were enriched in normal Tg levels (Figure 1F). The complete  
237 metagenomeSeq analysis can be found in Table S3, with a False Discovery Rate (FDR) ad-  
238 justed p-value < 0.05 considered significant.

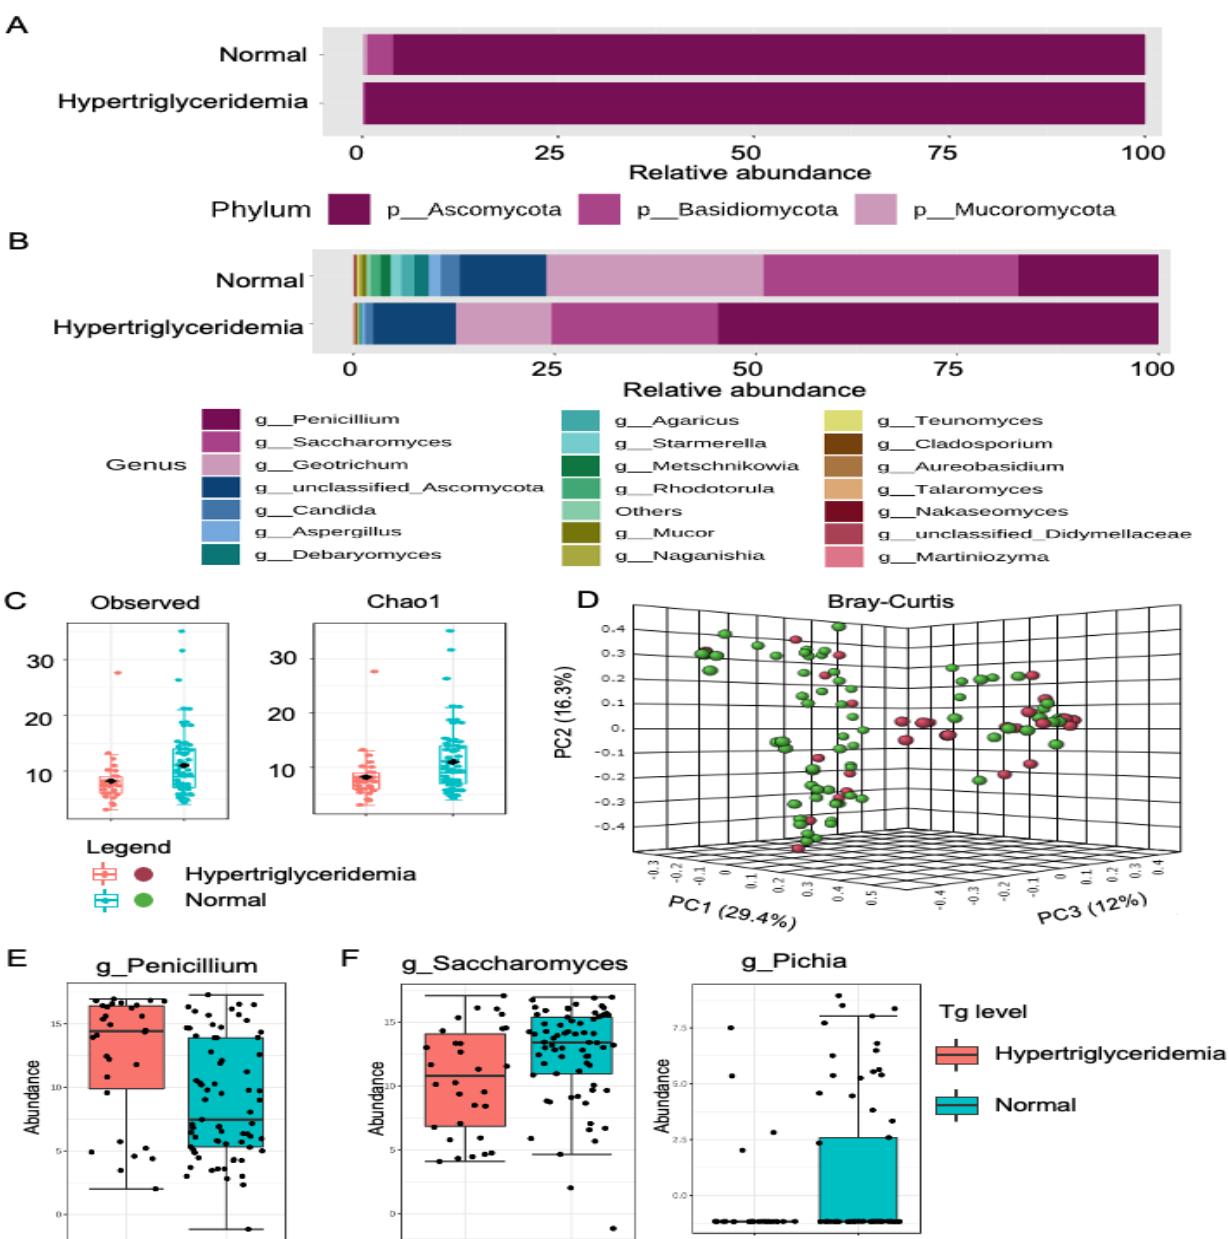

239

240 **Figure 1:** Profiling of gut mycobiome linked with Tg levels using ITS 2 gene region. The identified taxa at the A) phy-  
 241 lum; and B) genus levels were expressed as percentage abundance in merged samples. Only the top 20 genera are  
 242 shown at the genus level, with the remainder classified in Others. C) Alpha diversity analysis using observed species  
 243 number and Chao1 indices revealed significant differences in species richness at the genus level between two groups  
 244 ( $p$ -value= 0.0123). D) Beta diversity analysis based on Bray-Curtis dissimilarity metric reveals significant variation be-  
 245 tween two groups ( $R = 0.010$ ,  $p$ -value < 0.008). The boxplots depicted the abundance of significant fungal taxa preva-  
 246 lent in E) hypertriglyceridemia; and F) normal Tg levels using metagenomeSeq. The red and blue boxplots repre-  
 247 sented hypertriglyceridemia and normal Tg level, respectively.



248

249

### **3.3 Fungal community composition and diversity in high and normal VLDL groups**

250

251

252

253

254

255

256

257

258

259

The taxonomy distribution among high (n=29) and normal VLDL (n=67) groups were relatively similar to hypertriglyceridemia and normal Tg levels groups. The fungal composition was predominated by *Ascomycota* phyla in both groups (High VLDL=99.6%, normal VLDL=96.5%), represented by *Penicillium*, *Saccharomyces*, *Geotrichum*, and unclassified *Ascomycota* genera. Of these, the highest proportion of *Penicillium* genera was detected in the high VLDL group (53.2%), whereas the normal VLDL group constituted a larger proportion of *Saccharomyces* (32.5%) and *Geotrichum* (28%) genera. Unclassified *Ascomycota* had a comparable prevalence in both groups, contributing to 9.9% to 11% of overall abundance in the normal and high VLDL groups, respectively. Figure S2 and Table S2 provide additional information on fungi composition based on VLDL levels.

260

261

262

263

264

265

266

267

268

269

Likewise, the observed species number and Chao1 metrics reflected significant differences in fungal diversity between the normal and high VLDL groups, with normal VLDL exhibiting greater variation than high VLDL (both  $p=0.0183$ , T-test=2.4181; Figure 2C). Beta diversity using the ANOSIM approach showcased distinct fungi variation at the genus level across two groups, as evidenced by the Bray-Curtis distance index with  $p$ -value  $< 0.003$  and [ANOSIM]R= 0.11841 (Figure 2D). Besides, 14 out of 25 genera was found to associated with normal normal VLDL levels (Figure S3). Figure 1E illustrated the significant prevalence of *Saccharomyces* ( $p$ -value=0.003, FDR=0.018), *Pichia* ( $p$ -value= $1.07e^{-08}$ , FDR= $1.07e^{-07}$ ) and *Teuomyces* genera ( $p$ -value=0.0002, FDR=0.002) based on metagenomeSeq analysis (Table S4).

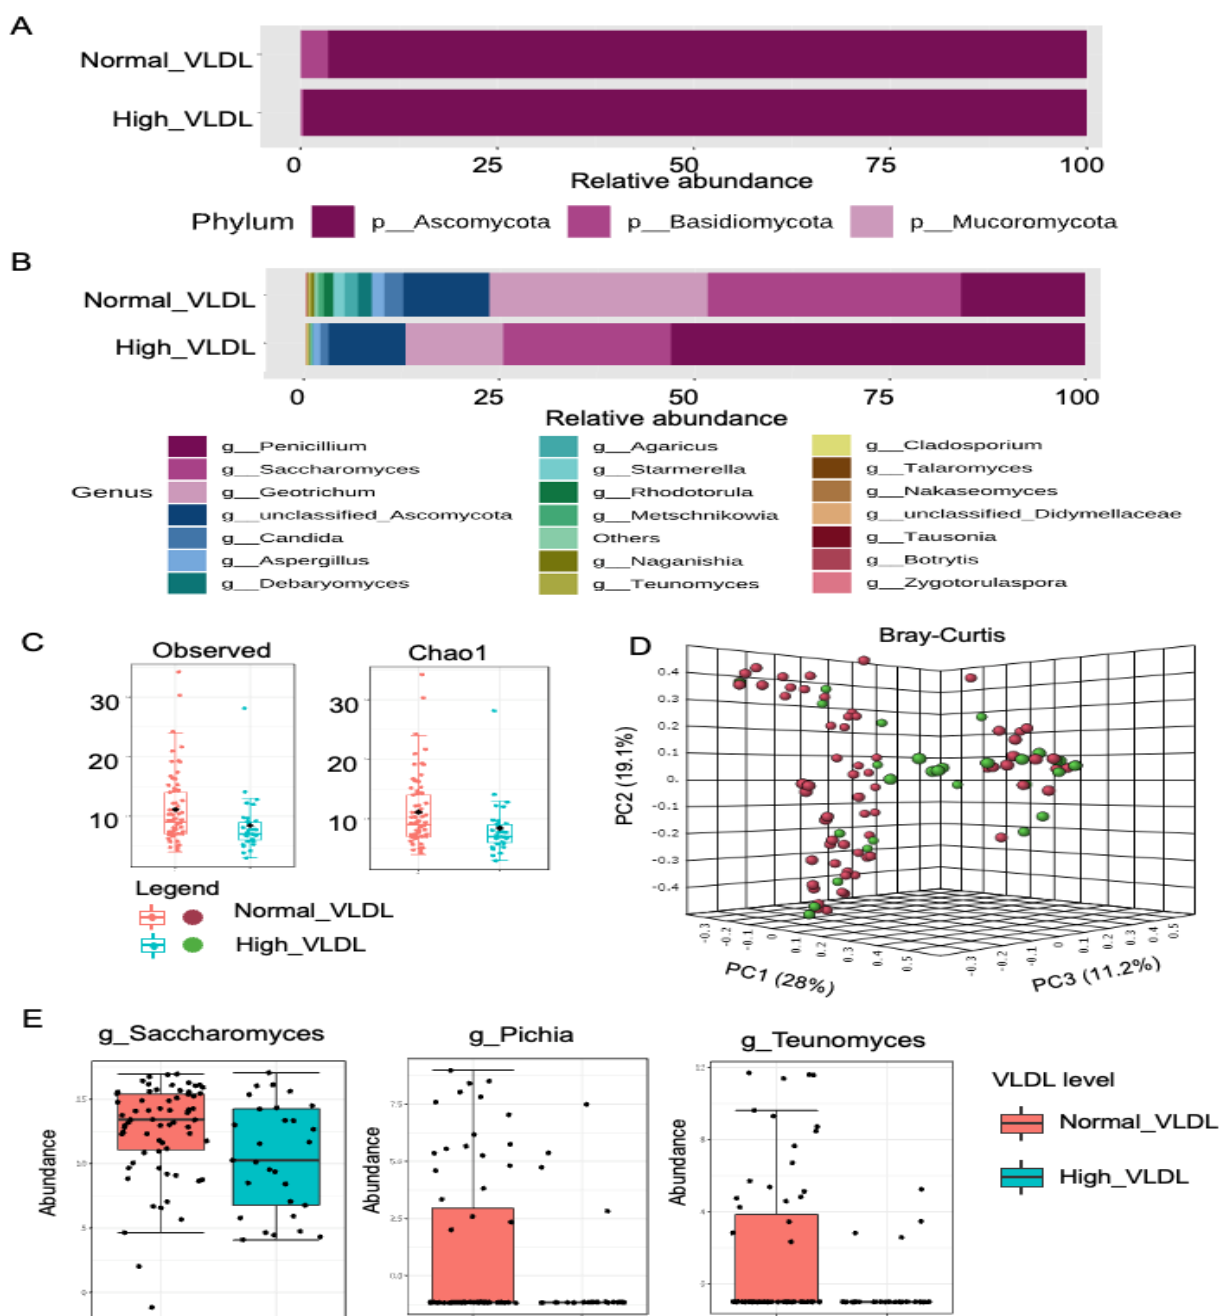

270

271 **Figure 2:** Profiling of gut mycobiome linked with VLDL levels using ITS 2 gene region. The identified taxa at the A)  
 272 phylum; and B) genus levels were expressed as percentage abundance in merged samples. Only the top 20 genera  
 273 are shown at the genus level, with the remainder classified in Others. C) Alpha diversity analysis using observed spe-  
 274 cies number and Chao1 indices revealed significant differences in species richness at the genus level between two  
 275 groups ( $p$ -value = 0.0183). D) Beta diversity analysis based on Bray-Curtis dissimilarity metric reveals significant varia-  
 276 tion between two groups ( $R = 0.012$ ,  $p$ -value < 0.003). E) The boxplots depicted the abundance of significant fungal  
 277 taxa prevalent in normal VLDL level using metagenomeSeq. The red and blue boxplots represented normal VLDL and

278 high VLDL, respectively.

### 279 **3.4 Core mycobiome at Tg and VLDL Levels Reveals the Interconnectedness**

280 The fungal genera that were consistently present across the sample groups  
281 were identified at a 20% sample prevalence. *Penicillium*, *Saccharomyces*, unclassified  
282 *Ascomycota*, and *Geotrichium* genera were common in the core mycobiome detected at  
283 Tg and VLDL levels. Hypertriglyceridemia had the most prevalence of *Penicillium* (preva-  
284 lence= 0.8), followed by *Saccharomyces*, unclassified *Ascomycota*, and *Geotrichium*.  
285 Meanwhile, *Saccharomyces* (prevalence = 0.8) was abundant among normal Tg groups,  
286 followed by unclassified *Ascomycota*, *Penicillium*, and *Geotrichium*. The core mycobiome  
287 based on VLDL levels was similar to Tg levels, with high VLDL matching with hyper-  
288 triglyceridemia and normal VLDL matching with normal Tg groups (Figure S3).

289 A Venn network was constructed to demonstrate the connection of the core  
290 mycobiome at the genus level between Tg levels and VLDL levels (Figure 3A). A total of  
291 16 fungi were found in groups with normal Tg and normal VLDL levels, whereas 4 fungi  
292 were common in hypertriglyceridemia with high VLDL groups. Interestingly, 12 fungi  
293 were interconnected among four groups, including *Penicillium*, *Saccharomyces*, unclassi-  
294 fied *Ascomycota*, and *Geotrichium* genera. *Cladosporium* was detected in all three  
295 groups, except hypertriglyceridemia, while *Tausonia* was only found in the normal Tg  
296 group. Besides, a Venn diagram summarized the number of core mycobiome of four  
297 groups, with normal Tg and VLDL having more fungi genera (30 and 29 fungi, respec-  
298 tively) than hypertriglyceridemia and high VLDL (16 and 17 fungi, respectively) (Figure  
299 3B). The complete output of the Venn diagram is available in the supplementary section  
300 (Table S5).

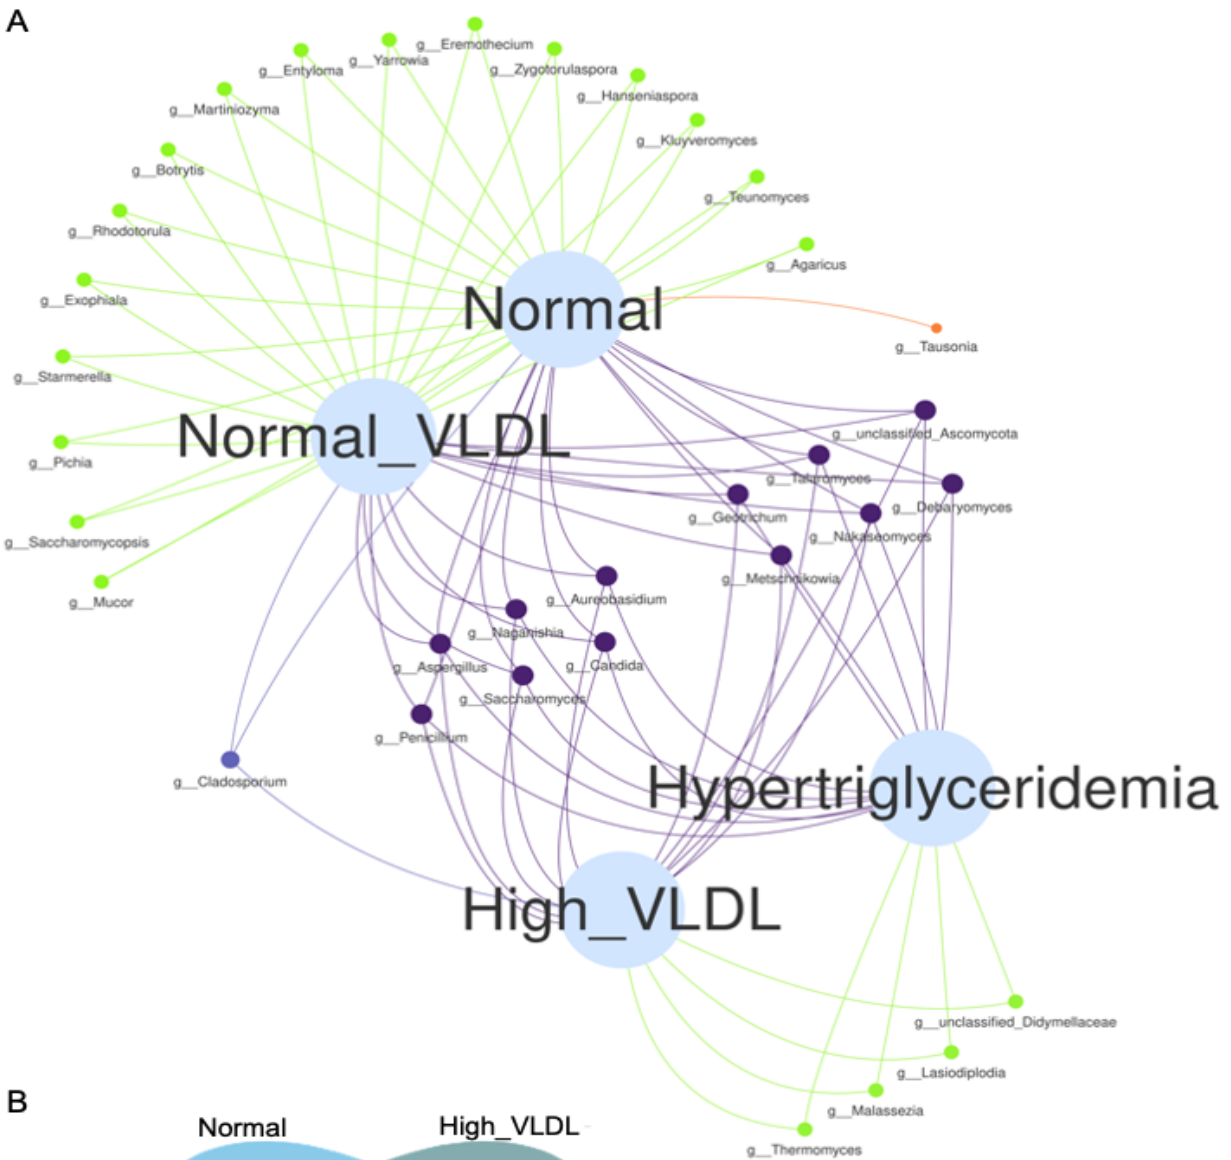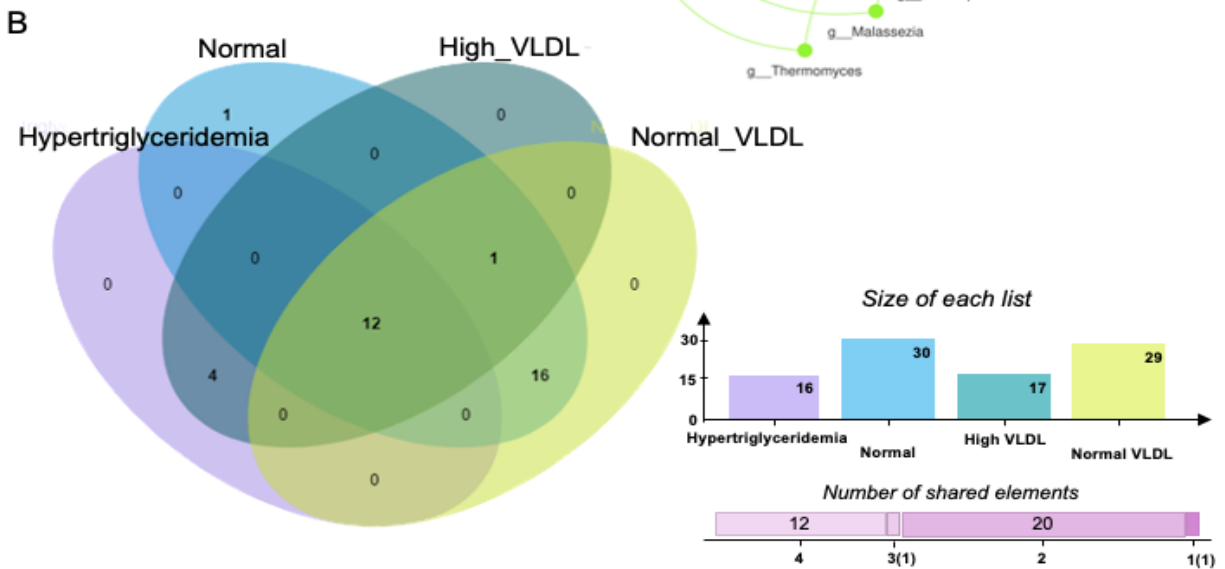

302 **Figure 3:** Venn diagram-based analysis revealed the association of core mycobiota between Tg and VLDL levels. A)  
303 Networks of core mycobiota shared by Tg and VLDL groups. Hyperglyceridemia shared connection with high VLDL,  
304 while mycobiota in normal Tg levels is associated with normal VLDL. B) Venn diagram of core mycobiota composi-  
305 tion. Hypertriglyceridemia denoted in purple, Normal Tg levels in blue, High VLDL in grey and Normal VLDL in yellow.  
306 The number represents the number of core mycobiota belong to each group. The numbers shown in overlapping  
307 regions represent the number of shared fungi. Notice that 16 fungi genera are shared between normal Tg and VLDL  
308 levels, meanwhile 12 fungi genera are commonly shared with all groups.

309

### 310 **3.5 Correlation Analysis of Fungal Communities with Macronutrients among Hyper-** 311 **triglyceridemia Individuals**

312 The association between macronutrients and fungal communities in hypertriglyc-  
313 eridemia and normal Tg groups was analyzed using PCA analysis. The first two principal  
314 coordinates (Dim1= 19.7%, Dim2= 11.1%) described the variability in macronutrients  
315 and mycobiome between the hypertriglyceridemia and normal Tg groups. As illustrated  
316 in Figure 4A, the macronutrients, particularly polyunsaturated fatty acids, monounsatu-  
317 rated fatty acids, fat, protein, sugars, carbohydrate available, saturated fatty acids, and  
318 dietary fiber, were grouped together and intimately linked. In the meantime, legumes,  
319 vegetable oil, alcohol, butter, and other fat, as well as fungal communities, were iso-  
320 lated from the clustered groupings and weakly correlated with one another. Significant  
321 clustering of hypertriglyceridemia and normal Tg groups was observed, with ellipses  
322 overlapping between the two groups. Hypertriglyceridemia groups were distributed  
323 around fatty acids groupings, while normal Tg groups encompassed a broader range of  
324 macronutrients. The correlation heatmap depicted the degree of Pearson correlation  
325 coefficient between macronutrients and mycobiome, revealing a significant strong posi-  
326 tive correlation between macronutrients ( $p < 0.05$ ; Figure 4B, Table 1). While legumes  
327 were strongly correlated to the genus *Agaricus*, other dietary elements such as dietary  
328 fiber and fatty acids have no significant association with mycobiome profiles.

329 To further explore the effect of macronutrients among hypertriglyceridemia and  
330 normal Tg groups, the significant macronutrients were chosen to visualize the contribu-  
331 tion of macronutrients in calories ( $\text{Cal kg body weight}^{-1} \text{ day}^{-1}$ ) among the two groups.  
332 The high calories intake indicated the high energy intake, with carbohydrate available  
333 ( $195 \pm 6.479$ ) ranking first, followed by protein ( $82.04 \pm 2.539$ ), fat ( $72.97 \pm 3.096$ ), sugars  
334 ( $64.73 \pm 3.085$ ), dietary fiber ( $24.43 \pm 0.857$ ), saturated fatty acids ( $23.55 \pm 1.214$ ), mono-  
335 saturated fatty acids ( $21.42 \pm 1.291$ ), alcohol ( $16.48 \pm 1.544$ ), and polyunsaturated fatty

336 acids ( $10.15 \pm 0.624$ ) (Figure 4C; Table S6). All the macronutrients tested showed signifi-  
337 cant differences with  $p < 0.0001$ .

338

339 Table 2 Pairwise comparison of macronutrients and mycobiome with a Pearson correlation coefficient greater than  
340 0.5.

341

| Variables1                | Variables2                  | Correlation coefficient ( $r > 0.5$ ) | Pearson ( $p < 0.05$ ) |
|---------------------------|-----------------------------|---------------------------------------|------------------------|
| Fat                       | Protein                     | 0.6                                   | 3.31E-11               |
|                           | Saturated fatty acids       | 0.8                                   | 1.86E-20               |
|                           | Monosaturated fatty acids   | 0.8                                   | 1.08E-19               |
|                           | Polyunsaturated fatty acids | 0.6                                   | 3.14E-09               |
| Sugars                    | Carbohydrate available      | 0.7                                   | 4.93E-14               |
|                           | Carbohydrate available      | 0.7                                   | 2.33E-11               |
| Saturated fatty acids     | Monosaturated fatty acids   | 0.6                                   | 8.22E-10               |
| Monosaturated fatty acids | Polyunsaturated fatty acids | 0.6                                   | 2.60E-08               |
| Legumes                   | <i>Agaricus</i>             | 0.9                                   | 2.49E-33               |
| <i>Candida</i>            | <i>Metschnikowia</i>        | 0.6                                   | 1.68E-10               |

342

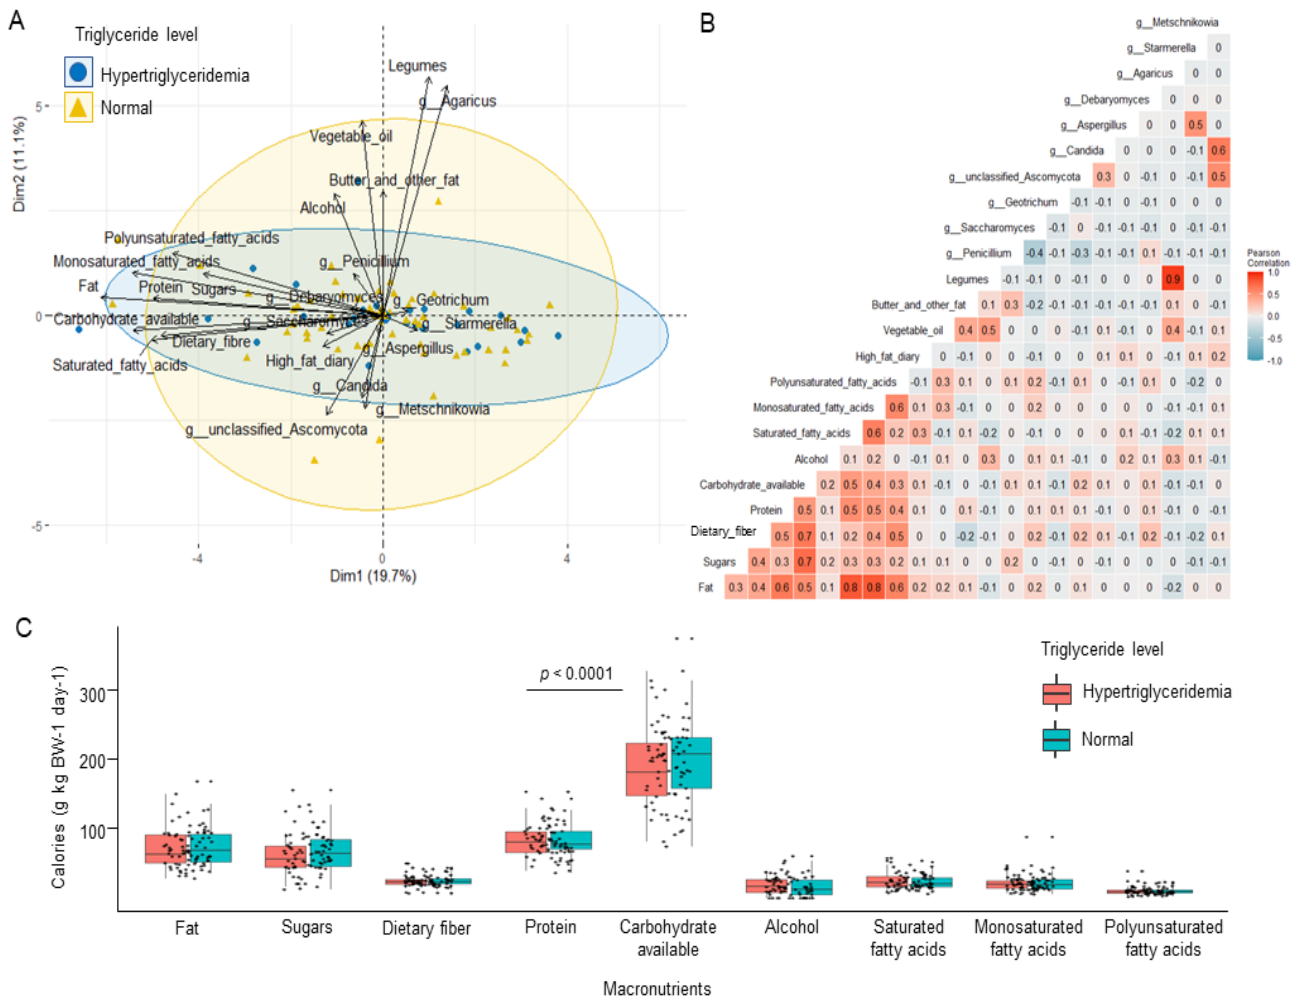

343

344

345 **Figure 4:** Multivariate statistical analysis of dietary nutrients with the top ten fungi genera. A) Biplots of principal  
 346 component analysis (PCA) demonstrated the explanatory variables as vectors (black lines) and points. Blue circles  
 347 represent hypertriglyceridemia and yellow triangles, normal Tg levels. The ellipses indicated the grouping. Positively  
 348 correlated variables have vectors pointing in the same direction, while negatively correlated variables have vectors  
 349 pointing in opposite directions. B) The strength of association between fungi genera and variables was expressed as  
 350 Pearson correlation coefficient in correlation matrix, represented by the colour strength and the numerical value.  
 351 Positive correlation is shown by red while negative correlation is denoted by blue. C) Boxplots described the type of  
 352 macronutrients linked with the of distribution of calories (Cal kg body weight<sup>-1</sup> day<sup>-1</sup>). One-sample t-test determined  
 353 that each macronutrient has a different population mean ( $p < 0.05$ ).

354

### 3.6 Correlation Analysis of Fungal Communities with SCFAs among Hypertriglyceridemia Individuals

355

356 The association between targetted metabolites and fungal communities in hyper-  
 357 triglyceridemia and normal Tg groups as depicted in Figure 5A, with all SCFAs (acetic  
 358 acid, propionic acid, isobutyric acid, butyric acid, isovaleric acid, and valeric acid)  
 359 grouped and closely related together. The mycobiome was extensively scattered and  
 360 was unlikely to connect with the targetted metabolites. Likewise, the two groups over-  
 361 lapped in that they both covered *Penicillium*, *Saccharomyces*, and *Geotrichum*. Despite  
 362 that the correlation matrix heatmap indicated a strong positive correlation among SCFAs  
 363 and mycobiome, but no obvious association was identified between them ( $p < 0.05$ ; Fig-  
 364 ure 5B, Table 2).

365 Furthermore, the concentration of SCFAs on triglyceride levels was also examined.  
 366 Acetic acid ( $7.8 \pm 0.325$ ) was the most abundant in both groups, followed by butyric acid  
 367 ( $1.636 \pm 0.106$ ) and propionic acid ( $1.727 \pm 0.081$ ), with normal Tg groups having a higher  
 368 concentration than hypertriglyceridemia groups (Figure 5C). All the SCFAs exhibited sig-  
 369 nificantly different means, as evidenced by a one-samples T-test with  $p < 0.0001$  (Table  
 370 S7).

371  
 372 Table 3 Pairwise comparison of metabolites and mycobiome with a Pearson correlation coefficient greater than 0.5.

373

| Variables1      | Variables2           | Correlation coefficient (>0.5) | Pearson ( $p < 0.05$ ) |
|-----------------|----------------------|--------------------------------|------------------------|
| Acetic acid     | Propionic acid       | 0.7                            | 3.245557e-16           |
|                 | Butyric acid         | 0.8                            | 1.002635e-19           |
| Propionic acid  | Isovaleric acid      | 0.6                            | 0.001434186            |
| Isobutyric acid | Isovaleric acid      | 1                              | 2.584355e-55           |
|                 | 2-Methylbutyric acid | 1                              | 6.412354e-52           |
| Isovaleric acid | 2-Methylbutyric acid | 1                              | 8.682254e-71           |
| Valeric acid    | 2-Methylbutyric acid | 0.6                            | 2.375447e-12           |
|                 | Isovaleric acid      | 0.7                            | 9.395219e-16           |
|                 | Butyric acid         | 0.6                            | 1.283421e-11           |
|                 | Isobutyric acid      | 0.8                            | 8.91927e-19            |
|                 | Propionic acid       | 0.6                            | 2.565943e-12           |



|                 |                    |     |              |
|-----------------|--------------------|-----|--------------|
|                 | Acetic acid        | 0.6 | 4.836536e-12 |
| <i>Agaricus</i> | <i>Starmerella</i> | 1   | 1.564446e-64 |

374

375

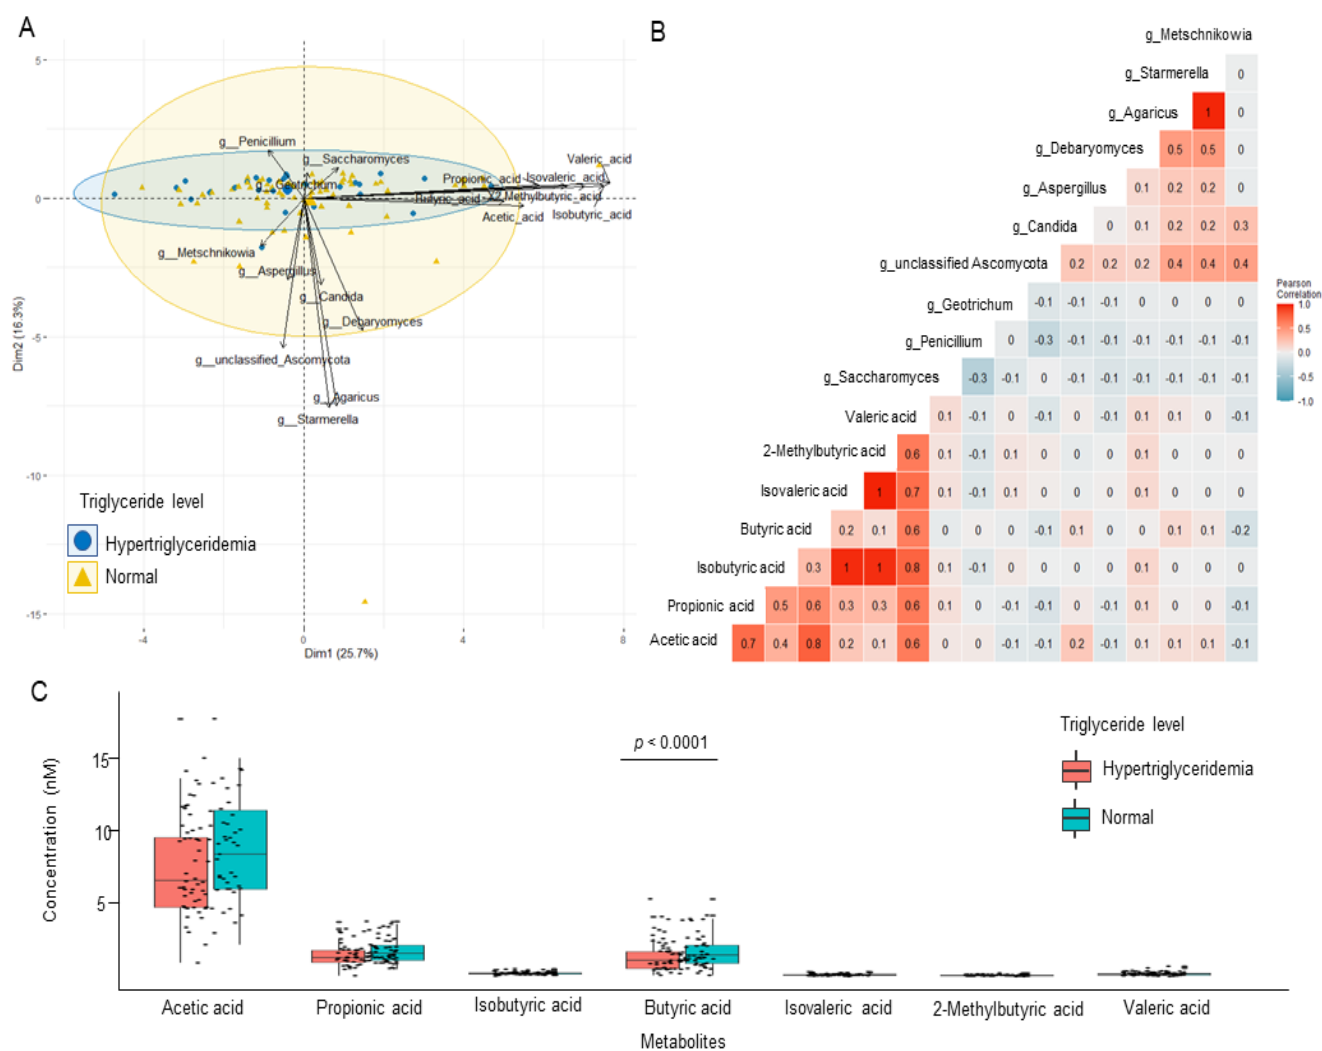

376

377 **Figure 5:** Multivariate statistical analysis of metabolites with the top ten fungi genera. A) Biplots of principal compo-  
 378 nent analysis (PCA) demonstrated the explanatory variables as vectors (black lines) and points. Blue circles represent  
 379 hypertriglyceridemia and yellow triangles, normal Tg levels. The ellipses indicated the grouping. Positively correlated  
 380 variables have vectors pointing in the same direction, while negatively correlated variables have vectors pointing in  
 381 opposite directions. B) The strength of association between targeted metabolites and fungi genera was expressed  
 382 as Pearson correlation coefficient in correlation matrix, represented by the colour strength and the numerical value.  
 383 Positive correlation is shown by red while negative correlation is denoted by blue. C) Boxplots depicted the concen-

384 tration of SCFAs among hypertriglyceridemia and normal TG individuals. One-sample t-test determined that each  
385 SCFAs has a different population mean ( $p < 0.05$ ).

#### 386 4. Discussion

387 The causes of hypertriglyceridemia among the elderly can be a result of interac-  
388 tions between genetic precursors [54], non-genetic factors such as unhealthy lifestyle  
389 [55], diseases related to metabolic syndromes [56], usage of some types of medicine  
390 [57] and high-fat diet [58]. Epidemiological studies consistently demonstrate strong as-  
391 sociations of plasma Tg levels that causing hypertriglyceridemia, with risk of atheroscle-  
392 rotic CVD [59], [60]. Most fungal species detected in gut mycobiome studies are consid-  
393 ered transient components of the community, and putative of environmental origin, in  
394 particular influenced by food-borne fungi and life-style [61], [62], together with other  
395 factors such as age, gender and geographical setting [16], [20], [63]. However, due to  
396 the dearth of information related to gut mycobiome studies, little is known about its re-  
397 lationship with fecal metabolome and other factors such as environmental effects, diet  
398 and life style [64] that may lead to hypertriglyceridemia. Here, we present data showing  
399 an association between gut mycobiome dysbiosis and hypertriglyceridemia in a homo-  
400 geneous and well-characterized healthy cohort of older Danish adults.

401 Collectively, we found that the richness of the gut mycobiome among the studied  
402 population was low within individuals with *Saccharomyces* and *Pichia* genera being  
403 common among healthier older Danish. Previous study also showed lower alpha diversi-  
404 ty of fungi community as compared to the gut bacterial community [21], [65], and de-  
405 creasing throughout the course of life due to ageing [20], [23], with *Saccharomyces* [66]  
406 and *Candida* [67] genera formed gut commensal. In the present study, *Penicillium* was  
407 observed among many of the subjects, and rather predominant among high Tg and VLDL  
408 groups. In contrast, previous study indicated that *Cladosporium* are associated with to-  
409 tal cholesterol and LDL among carotid atherosclerosis in younger Spanish populations  
410 [21]. A total of 30 of the included participants had Tg levels above the recommended  
411 level of 1.7 mmol/L [68]–[71]. Similarly, a similar pattern of good versus unhealthy VLDL  
412 cholesterol levels strongly linked to the mycobiome composition was observed. The par-  
413 ticular patterns observed for both plasma lipid markers are expected, termed as  
414 atherogenic lipid triad in dyslipidaemias [72], [73]. Tg and lipoprotein metabolism is  
415 linked as a result of their similar physicochemical characteristics involving two major or-  
416 gans such as intestine and liver [74]. In the intestine, bile acids emulsify fats into smaller  
417 particles which allows lipases to breakdown Tg into fatty acids. Fatty acids can then be  
418 absorbed and be used as substrates for chylomicron assembly that contributes to post-  
419 prandial Tg levels. Subsequently, the gut microbiota will generate SCFAs, secondary bile

420 acids and lipopolysaccharides [75] which activate receptors that regulate postprandial  
421 chylomicron production, and absorption of SCFAs and bile acids into the portal circula-  
422 tion. Meanwhile, the SCFA can act as substrates for *de novo* lipogenesis and contribute  
423 to VLDL production in the liver [33].

424 Next, a host-associated core microbiome based on network analysis was conduct-  
425 ed to explore common groups of fungi that were likely to be particularly important for  
426 host biological function [76]. Four fungi were found to be exclusively common in  
427 hypertiglyceridemia with high VLDL such as *Thermomyces*, *Malessezia*, *Lasiodiplodia* and  
428 unclassified *Didymellaceae* that associated with lipase production. Mounting study  
429 showed that *Thermomyces* [77]–[80], *Malessezia* [81]–[83], and *Lasiodiplodia* [84]–[86]  
430 involves during fats and lipids hydrolysis in production of fatty acids. Another interesting  
431 observation was 16 fungi were found solely in healthier groups with normal Tg and nor-  
432 mal VLDL levels, which are *Mucor*, *Saccharomycopsis*, *Pichia*, *Starmerella*, *Agaricus*, *Exo-*  
433 *phiala*, *Rhodotorula*, *Botrytis*, *Martiniozyma*, *Entyloma*, *Yarrowia*, *Eremothecium*, *Zygo-*  
434 *torulaspora*, *Hanseniaspora*, *Kluyveromyces* and *Teunomyces*. Despite being signatures  
435 of healthy gut due to long-term habitual diets and healthy host physiological states  
436 [23], [88], some fungi like *Mucor* was reported to be abundant in the gut of non-obese  
437 subjects [22], and confer protection from the risk of CVD [29]. Interestingly, 12 fungi  
438 were interconnected among groups such as *Penicillium*, *Saccharomyces*, unclassified *As-*  
439 *comycota*, and *Geotrichium* genera. This analysis showed that an upsurge in *Penicillium*  
440 genus could be associated with hypertriglyceridemia. However, the utility of *Penicillium*  
441 as a biomarker in predicting the progression of atherosclerosis by modulating the Tg  
442 and VLDL among older adults is still unclear, and therefore, this association warrants  
443 further investigation.

444 With regard to the dietary intake, the individuals from hypertriglyceridemia group  
445 pose high calories intake indicated the high energy intake due consumption of higher  
446 carbohydrate, protein, fat, sugars, and dietary fiber as previously reported [47] that  
447 highly adhered to the recommended intake of carbohydrates and fibres [89]. However,  
448 the intake of saturated and unsaturated fatty acid groups is still higher in hypertriglycer-  
449 idemia. Furthermore, correlation analysis with macronutrients components support and  
450 stand out the relevance of these fungal in hypertriglyceridemia. Particularly, in the case  
451 of *Penicillium*, and *Saccharomyces* positively correlate with diet rich in butter, sugar, and  
452 other fatty acids groups which are common indicators for higher Tg and VLDL cholester-  
453 ol in circulating serum of hosts, which have been reported to be associated with signa-  
454 tures in coronary atherosclerotic plaques [90], aneurysms of the carotid artery [91]. In-  
455 terestingly, other fungi like *Agaricus* and *Debaryomyces* are strongly associated with

456 legumes and moderately associated with dietary fibre, respectively. Based on another  
457 strand of study assessing the risk of suboptimal intake of macro- and micronutrients, it  
458 is apparent that healthy community-dwelling older Danes consumed more saturated  
459 fats and alcohol than recommended by official dietary reference values [92], which is  
460 common in the Western diet [93], [94].

461 SCFA have a variety of advantageous effects on the human energy metabolism, in-  
462 cluding the metabolism of glucose, lipids, and cholesterol in a variety of tissue types  
463 [95]. The acetic, butyric and propionic acid are significantly higher among healthier eld-  
464 erly, which consistent with a study reported previously in human [10] and animal model  
465 [96]. Here, we observed that acetic acid is the most predominant and moderately asso-  
466 ciated with *Candida*, *Debaryomyces*, *Agaricus* and *Starmerella*. Previous study described  
467 acetate and butyrate as fermentation products of the complex carbohydrates such as  
468 dietary fibres, and also the main substrate for the synthesis of cholesterol [97]. The *Sac-*  
469 *charomyces*, *Geotrichum* and *Debaryomyces* also were found to be moderately associ-  
470 ated with other SCFAs like propionic, butyric, valeric acids. However, no significant cor-  
471 relations between *Penicillium* and *Aspergillus*, with any of the SCFAs were identified.  
472 This suggests that the production of SCFAs may be driven by bacterial activities as previ-  
473 ously reported [98].

## 474 5. Conclusions

475 To the best of our knowledge, this is the first study to demonstrate that hyper-  
476 triglyceridemia among elderly is associated with gut mycobiome dysbiosis characterized  
477 by overall reduction of the microbial richness and diversity as well as dysbiosis pattern  
478 of the gut mycobiome structure compared to those senior citizens with normal levels of  
479 circulating plasma triglycerides. These findings also highlight that the everyday diet  
480 shapes the gut mycobiome and host metabolome components among the older citizens.  
481 However, it remains unknown whether the microbial markers and patterns identified  
482 here are also adaptable to changes in life styles and applicable to other cultures in the  
483 world.

484 .

485 **Supplementary Materials:** The following supporting information can be downloaded at:  
486 [www.mdpi.com/xxx/s1](http://www.mdpi.com/xxx/s1), Figure S1: title; Table S1: title; Video S1: title.

487 **Author Contributions:** HFA performed laboratory procedures; DSN, LH, SBE, SR, JLC, HFA designed the  
488 study; RLB, SR, GWH, LH collected and provided samples as well as analyzed clinical data; BK carried out  
489 metabolome analysis; WK carried out sequencing of libraries, HFA, JLC, tK, KF, DSN coupled and analyzed  
490 the different datasets of the study; HFA and DSN drafted the manuscript. All authors commented on, added  
491 paragraphs and approved the last version of this manuscript.

492

493 **Funding:** This project was supported by the University of Copenhagen-funded project “Counter-  
494 acting Age-related Loss of Skeletal Muscle (CALM)”, the Danish Dairy Research Foundation, Arla  
495 Foods Ingredients P/S, stipends from Universiti Malaysia Pahang, Malaysia, and Ministry of Edu-  
496 cation, Malaysia.

497 **Institutional Review Board Statement:** All experiments were performed in accordance with the  
498 Declaration of Helsinki II and approved by The Danish Regional Committees of the Capital Region  
499 (number H-4-2013-070) and data protected under Danish Data Protection Agency 2012-58-0004 –  
500 BBH-2015-001 I-Suite for study involving humans.

501 **Informed Consent Statement:** Informed consent was obtained from all subjects involved in the  
502 study and registered at ClinicalTrials.gov (NCT02034760).

503  
504 **Data Availability Statement:** The raw sequence data of this study were uploaded to EBI’s ENA  
505 under accession codes PRJEB34758 and PRJEB34758.

506 **Conflicts of Interest:** The authors declare no conflict of interest.

## 507 **References**

508

- 509 [1] H. Kim *et al.*, “Prevalence and incidence of atherosclerotic cardiovascular disease and its risk factors in Korea: a nationwide popula-  
510 tion-based study,” *BMC Public Health*, vol. 19, no. 1, p. 1112, 2019, doi: 10.1186/s12889-019-7439-0.
- 511 [2] T. M. Powell-Wiley *et al.*, “Obesity and Cardiovascular Disease: A Scientific Statement From the American Heart Association,” *Circula-  
512 tion*, vol. 143, no. 21, pp. e984–e1010, May 2021, doi: 10.1161/CIR.0000000000000973.
- 513 [3] F. D. Fuchs and P. K. Whelton, “High Blood Pressure and Cardiovascular Disease,” *Hypertension*, vol. 75, no. 2, pp. 285–292, Feb. 2020,  
514 doi: 10.1161/HYPERTENSIONAHA.119.14240.
- 515 [4] M. Hedayatnia *et al.*, “Dyslipidemia and cardiovascular disease risk among the MASHAD study population,” *Lipids Health Dis.*, vol. 19,  
516 no. 1, p. 42, 2020, doi: 10.1186/s12944-020-01204-y.
- 517 [5] M. Arca *et al.*, “Association of Hypertriglyceridemia with All-Cause Mortality and Atherosclerotic Cardiovascular Events in a Low-Risk  
518 Italian Population: The TG-REAL Retrospective Cohort Analysis,” *J. Am. Heart Assoc.*, vol. 9, no. 19, p. e015801, Oct. 2020, doi:  
519 10.1161/JAHA.119.015801.
- 520 [6] S. Ahmadmehrabi and W. H. W. Tang, “Gut microbiome and its role in cardiovascular diseases,” *Curr. Opin. Cardiol.*, vol. 32, no. 6,  
521 2017, [Online]. Available: [https://journals.lww.com/co-  
522 cardiology/Fulltext/2017/11000/Gut\\_microbiome\\_and\\_its\\_role\\_in\\_cardiovascular.17.aspx](https://journals.lww.com/co-cardiology/Fulltext/2017/11000/Gut_microbiome_and_its_role_in_cardiovascular.17.aspx).
- 523 [7] B. J. North and D. A. Sinclair, “The Intersection Between Aging and Cardiovascular Disease,” *Circ. Res.*, vol. 110, no. 8, pp. 1097–1108,  
524 Apr. 2012, doi: 10.1161/CIRCRESAHA.111.246876.
- 525 [8] P. Alonso-Fernández and M. Fuente, “Role of the immune system in aging and longevity,” *Curr Aging Sci*, vol. 4, 2011, doi:  
526 10.2174/1874609811104020078.
- 527 [9] S. Rampelli *et al.*, “Functional metagenomic profiling of intestinal microbiome in extreme ageing,” vol. 5, no. 12, pp. 902–912, 2013.
- 528 [10] M. J. Claesson *et al.*, “Gut microbiota composition correlates with diet and health in the elderly,” *Nature*, vol. 488, no. 7410, pp. 178–  
529 84, Aug. 2012, doi: 10.1038/nature11319.
- 530 [11] S. Saraswati and R. Sitaraman, “Aging and the human gut microbiota—from correlation to causality,” *Frontiers in Microbiology*, vol.

- 531 5. p. 764, 2015.
- 532 [12] N. Thevaranjan *et al.*, "Age-Associated Microbial Dysbiosis Promotes Intestinal Permeability, Systemic Inflammation, and Macrophage  
533 Dysfunction," *Cell Host Microbe*, vol. 21, no. 4, pp. 455-466.e4, Apr. 2017, doi: 10.1016/j.chom.2017.03.002.
- 534 [13] A. W. Ahmad *et al.*, "IDDF2022-ABS-0255 An observational study to identify the diversity of gut microbiome composition among  
535 obese versus healthy individuals among healthcare staffs and students in Pahang, Malaysia," *Gut*, vol. 71, no. Suppl 2, p. A171 LP-  
536 A173, Sep. 2022, doi: 10.1136/gutjnl-2022-IDDF.240.
- 537 [14] S. M. Ahmad Kendong, R. A. Raja Ali, K. N. M. Nawawi, H. F. Ahmad, and N. M. Mokhtar, "Gut Dysbiosis and Intestinal Barrier Dysfunc-  
538 tion: Potential Explanation for Early-Onset Colorectal Cancer," *Front. Cell. Infect. Microbiol.*, vol. 11, p. 1244, 2021, doi:  
539 10.3389/fcimb.2021.744606.
- 540 [15] N. S. Abd Khalid *et al.*, "IDDF2022-ABS-0263 Gut microbiome of women diagnosed with breast cancer within Pahang, Malaysia," *Gut*,  
541 vol. 71, no. Suppl 2, p. A175 LP-A177, Sep. 2022, doi: 10.1136/gutjnl-2022-IDDF.244.
- 542 [16] E. Biagi *et al.*, "Gut Microbiota and Extreme Longevity," *Curr. Biol.*, vol. 26, no. 11, pp. 1480-1485, Aug. 2016, doi:  
543 10.1016/j.cub.2016.04.016.
- 544 [17] M. A. Jackson *et al.*, "Signatures of early frailty in the gut microbiota," *Genome Med.*, vol. 8, no. 1, pp. 1-11, 2016, doi:  
545 10.1186/s13073-016-0262-7.
- 546 [18] P. W. O'Toole and I. B. Jeffery, "Gut microbiota and aging," *Science (80-. )*, vol. 350, no. 6265, pp. 1214-1215, Dec. 2015.
- 547 [19] S.-H. Park, K.-A. Kim, Y.-T. Ahn, J.-J. Jeong, C.-S. Huh, and D.-H. Kim, "Comparative analysis of gut microbiota in elderly people of ur-  
548 banized towns and longevity villages," *BMC Microbiol.*, vol. 15, no. 1, pp. 1-9, 2015, doi: 10.1186/s12866-015-0386-8.
- 549 [20] F. Strati *et al.*, "Age and Gender Affect the Composition of Fungal Population of the Human Gastrointestinal Tract," *Front. Microbiol.*,  
550 vol. 7, p. 1227, 2016, doi: 10.3389/fmicb.2016.01227.
- 551 [21] A. K. Nash *et al.*, "The gut mycobiome of the Human Microbiome Project healthy cohort," *Microbiome*, vol. 5, no. 1, p. 153, Nov. 2017,  
552 doi: 10.1186/s40168-017-0373-4.
- 553 [22] M. Mar Rodríguez *et al.*, "Obesity changes the human gut mycobiome," *Sci. Rep.*, vol. 5, p. 14600, 2015, doi:  
554 10.1038/srep14600\rhttp://www.nature.com/articles/srep14600#supplementary-information.
- 555 [23] M. Shuai *et al.*, "Mapping the human gut mycobiome in middle-aged and elderly adults: multiomics insights and implications for host  
556 metabolic health," *Gut*, vol. 71, no. 9, pp. 1812 LP - 1820, Sep. 2022, doi: 10.1136/gutjnl-2021-326298.
- 557 [24] F. Zhang, D. Aschenbrenner, J. Y. Yoo, and T. Zuo, "The gut mycobiome in health, disease, and clinical applications in association with  
558 the gut bacterial microbiome assembly," *The Lancet Microbe*, Sep. 2022, doi: 10.1016/S2666-5247(22)00203-8.
- 559 [25] H. F. Ahmad *et al.*, "IDDF2020-ABS-0174 Onset of hypertriglyceridemia in relation to dietary intake, gut microbiome and metabolom-  
560 ics signatures among home dwelling elderly," *Gut*, vol. 69, no. Suppl 2, p. A21 LP-A21, Nov. 2020, doi: 10.1136/gutjnl-2020-IDDF.29.
- 561 [26] C. A. Kumamoto, "The Fungal Mycobiota: Small Numbers, Large Impacts," *Cell Host Microbe*, vol. 19, no. 6, pp. 750-751, Jun. 2016,  
562 doi: <http://dx.doi.org/10.1016/j.chom.2016.05.018>.
- 563 [27] H. Sokol *et al.*, "Fungal microbiota dysbiosis in IBD," *Gut*, Feb. 2016, doi: 10.1136/gutjnl-2015-310746.

- 
- 564 [28] G. Liguori *et al.*, “Fungal Dysbiosis in Mucosa-associated Microbiota of Crohn’s Disease Patients,” *J. Crohn’s Colitis*, vol. 10, no. 3, pp.  
565 296–305, Mar. 2016, doi: 10.1093/ecco-jcc/jjv209.
- 566 [29] M. R. Chacón *et al.*, “The gut mycobiome composition is linked to carotid atherosclerosis,” *Benef. Microbes*, vol. 9, no. 2, pp. 185–198,  
567 Nov. 2017, doi: 10.3920/BM2017.0029.
- 568 [30] J. Peng, F. Luo, G. Ruan, R. Peng, and X. Li, “Hypertriglyceridemia and atherosclerosis,” *Lipids Health Dis.*, vol. 16, p. 233, Dec. 2017,  
569 doi: 10.1186/s12944-017-0625-0.
- 570 [31] N. Sarwar *et al.*, “Triglycerides and the Risk of Coronary Heart Disease,” *Circulation*, vol. 115, no. 4, pp. 450 LP–458, Jan. 2007.
- 571 [32] N. BG, M. Benn, P. Schnohr, and A. Tybjaerg-Hansen, “Nonfasting triglycerides and risk of myocardial infarction, ischemic heart dis-  
572 ease, and death in men and women,” *JAMA*, vol. 298, no. 3, pp. 299–308, Jul. 2007.
- 573 [33] Y. Yu, F. Raka, and K. Adeli, “The Role of the Gut Microbiota in Lipid and Lipoprotein Metabolism,” *Journal of Clinical Medicine*, vol. 8,  
574 no. 12. 2019, doi: 10.3390/jcm8122227.
- 575 [34] R. Villette *et al.*, “Unraveling Host-Gut Microbiota Dialogue and Its Impact on Cholesterol Levels ,” *Frontiers in Pharmacology* , vol.  
576 11. 2020, [Online]. Available: <https://www.frontiersin.org/articles/10.3389/fphar.2020.00278>.
- 577 [35] J. Ma and H. Li, “The Role of Gut Microbiota in Atherosclerosis and Hypertension ,” *Frontiers in Pharmacology* , vol. 9. 2018, [Online].  
578 Available: <https://www.frontiersin.org/articles/10.3389/fphar.2018.01082>.
- 579 [36] A. K. Duttaroy, “Role of Gut Microbiota and Their Metabolites on Atherosclerosis, Hypertension and Human Blood Platelet Function: A  
580 Review,” *Nutrients*, vol. 13, no. 1. 2021, doi: 10.3390/nu13010144.
- 581 [37] M. D. Pieczynska, Y. Yang, S. Petrykowski, O. K. Horbanczuk, A. G. Atanasov, and J. O. Horbanczuk, “Gut Microbiota and Its Metabolites  
582 in Atherosclerosis Development,” *Molecules*, vol. 25, no. 3. 2020, doi: 10.3390/molecules25030594.
- 583 [38] J. White, T.J., Bruns, T., Lee, S., & Taylor, “Amplification and direct sequencing of fungal ribosomal RNA genes for phylogenetics.,” in  
584 *PCR Protocols: A guide to Methods and Applications.*, New York, USA: Academic Press, Inc, 1990, pp. 315–322.
- 585 [39] D. D. Tay, S. W. Siew, S. Shamzir Kamal, M. N. Razali, and H. F. Ahmad, “ITS1 amplicon sequencing of feline gut mycobiome of Malay-  
586 sian local breeds using Nanopore Flongle,” *Arch. Microbiol.*, vol. 204, no. 6, p. 314, 2022, doi: 10.1007/s00203-022-02929-3.
- 587 [40] C. L. Schoch *et al.*, “Finding needles in haystacks: linking scientific names, reference specimens and molecular data for Fungi,” *Data-*  
588 *base*, vol. 2014, p. bau061, Jan. 2014, doi: 10.1093/database/bau061.
- 589 [41] R. L. Bechshøft *et al.*, “Counteracting Age-related Loss of Skeletal Muscle Mass: a clinical and ethnological trial on the role of protein  
590 supplementation and training load (CALM Intervention Study): study protocol for a randomized controlled trial,” *Trials*, vol. 17, no. 1,  
591 p. 397, Aug. 2016, doi: 10.1186/s13063-016-1512-0.
- 592 [42] S. Chen, Y. Zhou, Y. Chen, and J. Gu, “fastp: an ultra-fast all-in-one FASTQ preprocessor,” *Bioinformatics*, vol. 34, no. 17, pp. i884–i890,  
593 Sep. 2018, doi: 10.1093/bioinformatics/bty560.
- 594 [43] M. Martin, “Cutadapt removes adapter sequences from high-throughput sequencing reads,” *EMBnet.journal; Vol 17, No 1 Next Gener.*  
595 *Seq. Data Anal.*, 2011, doi: 10.14806/ej.17.1.200.
- 596 [44] B. J. Callahan, P. J. McMurdie, M. J. Rosen, A. W. Han, A. J. A. Johnson, and S. P. Holmes, “DADA2: High-resolution sample inference

- 597 from Illumina amplicon data," *Nat. Methods*, vol. 13, no. 7, pp. 581–583, 2016, doi: 10.1038/nmeth.3869.
- 598 [45] E. Bolyen *et al.*, "Reproducible, interactive, scalable and extensible microbiome data science using QIIME 2," *Nat. Biotechnol.*, vol. 37,  
599 no. 8, pp. 852–857, 2019, doi: 10.1038/s41587-019-0209-9.
- 600 [46] J. Chong, P. Liu, G. Zhou, and J. Xia, "Using MicrobiomeAnalyst for comprehensive statistical, functional, and meta-analysis of micro-  
601 biome data," *Nat. Protoc.*, vol. 15, no. 3, pp. 799–821, 2020, doi: 10.1038/s41596-019-0264-1.
- 602 [47] J. L. Castro-Mejia *et al.*, "Physical fitness in community-dwelling older adults is linked to dietary intake, gut microbiota, and me-  
603 tabolomic signatures," *Aging Cell*, vol. 19, no. 3, p. e13105, Mar. 2020, doi: <https://doi.org/10.1111/acer.13105>.
- 604 [48] A. Dhariwal, J. Chong, S. Habib, I. L. King, L. B. Agellon, and J. Xia, "MicrobiomeAnalyst: A web-based tool for comprehensive statistical,  
605 visual and meta-analysis of microbiome data," *Nucleic Acids Res.*, vol. 45, no. W1, pp. W180–W188, 2017, doi: 10.1093/nar/gkx295.
- 606 [49] J. N. Paulson, O. C. Stine, H. C. Bravo, and M. Pop, "Differential abundance analysis for microbial marker-gene surveys," *Nat. Methods*,  
607 vol. 10, no. 12, pp. 1200–1202, 2013, doi: 10.1038/nmeth.2658.
- 608 [50] T. Chen, H. Zhang, Y. Liu, Y.-X. Liu, and L. Huang, "EVENn: Easy to create repeatable and editable Venn diagrams and Venn networks  
609 online," *J. Genet. Genomics*, vol. 48, no. 9, pp. 863–866, Sep. 2021, doi: 10.1016/j.jgg.2021.07.007.
- 610 [51] S. W. Siew, S. M. Musa, N. 'Azyyati Sabri, M. F. Farida Asras, and H. F. Ahmad, "The Microbiome and Metabolome Analyses of Pre-  
611 Treated Healthcare Wastes During Covid-19 Pandemic Reveal Potent Pathogens, Antibiotics Residues, and Antibiotic Resistance Genes  
612 Against Beta-Lactams," *SSRN Electron. J.*, vol. 2, no. 3, pp. 54–59, 2022, doi: 10.2139/ssrn.4240492.
- 613 [52] A. F. Members: *et al.*, "'European Guidelines on cardiovascular disease prevention in clinical practice (version 2012)' The Fifth Joint  
614 Task Force of the European Society of Cardiology and Other Societies on Cardiovascular Disease Prevention in Clinical Practice (consti-  
615 tuted by r," *Eur. Heart J.*, vol. 33, no. 17, p. 2126, Sep. 2012.
- 616 [53] Ž. Reiner, "Hypertriglyceridaemia and risk of coronary artery disease," *Nat. Rev. Cardiol.*, vol. 14, p. 401, Mar. 2017.
- 617 [54] G. F. Watts, E. M. M. Ooi, and D. C. Chan, "Demystifying the management of hypertriglyceridaemia," *Nat. Rev. Cardiol.*, vol. 10, p. 648,  
618 Sep. 2013.
- 619 [55] P. M. Hunter and R. A. Hegele, "Functional foods and dietary supplements for the management of dyslipidaemia," *Nat. Rev. Endocri-  
620 nol.*, vol. 13, p. 278, Jan. 2017.
- 621 [56] S. M. Grundy, "Hypertriglyceridemia, insulin resistance, and the metabolic syndrome," *Am. J. Cardiol.*, vol. 83, no. 9, Supplement 2,  
622 pp. 25–29, 1999, doi: [https://doi.org/10.1016/S0002-9149\(99\)00211-8](https://doi.org/10.1016/S0002-9149(99)00211-8).
- 623 [57] H. K. Singh, M. S. Prasad, A. K. Kandasamy, and K. Dharanipragada, "Tamoxifen-induced hypertriglyceridemia causing acute pancreati-  
624 tis," *J. Pharmacol. Pharmacother.*, vol. 7, no. 1, pp. 38–40, Feb. 2016, doi: 10.4103/0976-500X.179365.
- 625 [58] K. P. Luna-Castillo *et al.*, "The Effect of Dietary Interventions on Hypertriglyceridemia: From Public Health to Molecular Nutrition Evi-  
626 dence," *Nutrients*, vol. 14, no. 5, 2022, doi: 10.3390/nu14051104.
- 627 [59] B. G. Nordestgaard and A. Varbo, "Triglycerides and cardiovascular disease," *Lancet*, vol. 384, no. 9943, pp. 626–635, Aug. 2014, doi:  
628 10.1016/S0140-6736(14)61177-6.
- 629 [60] J. Borén *et al.*, "Low-density lipoproteins cause atherosclerotic cardiovascular disease: pathophysiological, genetic, and therapeutic



- 630 insights: a consensus statement from the European Atherosclerosis Society Consensus Panel," *Eur. Heart J.*, vol. 41, no. 24, pp. 2313–  
631 2330, Jun. 2020, doi: 10.1093/eurheartj/ehz962.
- 632 [61] A. M. Madsen *et al.*, "Generation and Characterization of Indoor Fungal Aerosols for Inhalation Studies," *Appl. Environ. Microbiol.*,  
633 vol. 82, no. 8, pp. 2479–2493, Apr. 2016, doi: 10.1128/AEM.04063-15.
- 634 [62] H. E. Hallen-Adams and M. J. Suhr, "Fungi in the healthy human gastrointestinal tract," *Virulence*, vol. 8, no. 3, pp. 352–358, Apr. 2017,  
635 doi: 10.1080/21505594.2016.1247140.
- 636 [63] T. Yatsunenko, F. E. Rey, M. J. Manary, I. Trehan, M. G. Dominguez-Bello, and M. Contreras, "Human gut microbiome viewed across  
637 age and geography," *Nature*, vol. 486, 2012.
- 638 [64] T. Jensen *et al.*, "Whey protein stories – An experiment in writing a multidisciplinary biography," *Appetite*, vol. 107, pp. 285–294,  
639 2016, doi: <https://doi.org/10.1016/j.appet.2016.08.010>.
- 640 [65] J. Tang, I. D. Iliev, J. Brown, D. M. Underhill, and V. A. Funari, "Mycobiome: Approaches to analysis of intestinal fungi," *J. Immunol.*  
641 *Methods*, vol. 421, pp. 112–121, Jun. 2015, doi: 10.1016/j.jim.2015.04.004.
- 642 [66] D. M. Underhill and I. D. Iliev, "The mycobiota: interactions between commensal fungi and the host immune system," *Nat Rev Immunol*,  
643 vol. 14, no. 6, pp. 405–416, Jun. 2014.
- 644 [67] P. D. Scanlan and J. R. Marchesi, "Micro-eukaryotic diversity of the human distal gut microbiota: qualitative assessment using culture-  
645 dependent and -independent analysis of faeces," *ISME J*, vol. 2, no. 12, pp. 1183–1193, Jul. 2008.
- 646 [68] A. C. Scott *et al.*, "Chemical Mediators of the Muscle Ergoreflex in Chronic Heart Failure," *Circulation*, vol. 106, no. 2, pp. 214 LP – 220,  
647 Jul. 2002.
- 648 [69] L. Berglund *et al.*, "Evaluation and Treatment of Hypertriglyceridemia: An Endocrine Society Clinical Practice Guideline," *J. Clin. Endo-*  
649 *crinol. Metab.*, vol. 97, no. 9, pp. 2969–2989, Sep. 2012.
- 650 [70] T. J. Anderson *et al.*, "2012 Update of the Canadian Cardiovascular Society Guidelines for the Diagnosis and Treatment of Dyslipidemia  
651 for the Prevention of Cardiovascular Disease in the Adult," *Can. J. Cardiol.*, vol. 29, no. 2, pp. 151–167, Feb. 2013, doi:  
652 10.1016/j.cjca.2012.11.032.
- 653 [71] T. Teramoto *et al.*, "Executive Summary of the Japan Atherosclerosis Society (JAS) Guidelines for the Diagnosis and Prevention of  
654 Atherosclerotic Cardiovascular Diseases in Japan &mdash;2012 Version," *J. Atheroscler. Thromb.*, vol. 20, no. 6, pp. 517–523, 2013,  
655 doi: 10.5551/jat.15792.
- 656 [72] Ž. Reiner *et al.*, "ESC/EAS Guidelines for the management of dyslipidaemiasThe Task Force for the management of dyslipidaemias of  
657 the European Society of Cardiology (ESC) and the European Atherosclerosis Society (EAS)," *Eur. Heart J.*, vol. 32, no. 14, pp. 1769–  
658 1818, Jul. 2011.
- 659 [73] A. L. Catapano *et al.*, "2016 ESC/EAS Guidelines for the Management of Dyslipidaemias," *Atherosclerosis*, vol. 253, pp. 281–344, Oct.  
660 2016, doi: 10.1016/j.atherosclerosis.2016.08.018.
- 661 [74] M. Alves-Bezerra and D. E. Cohen, "Triglyceride Metabolism in the Liver," in *Comprehensive Physiology*, 2017, pp. 1–22.
- 662 [75] E. Baltierra-Trejo, J. M. Sánchez-Yáñez, O. Buenostro-Delgado, and L. Márquez-Benavides, "Production of short-chain fatty acids from  
663 the biodegradation of wheat straw lignin by *Aspergillus fumigatus*," *Bioresour. Technol.*, vol. 196, pp. 418–425, 2015, doi:

- 664 <https://doi.org/10.1016/j.biortech.2015.07.105>.
- 665 [76] A. Risely, "Applying the core microbiome to understand host–microbe systems," *J. Anim. Ecol.*, vol. 89, no. 7, pp. 1549–1558, Jul.  
666 2020, doi: <https://doi.org/10.1111/1365-2656.13229>.
- 667 [77] T. O. Akanbi, J. L. Adcock, and C. J. Barrow, "Selective concentration of EPA and DHA using *Thermomyces lanuginosus* lipase is due to  
668 fatty acid selectivity and not regioselectivity," *Food Chem.*, vol. 138, no. 1, pp. 615–620, 2013, doi:  
669 <https://doi.org/10.1016/j.foodchem.2012.11.007>.
- 670 [78] M. Aziz, F. Husson, and S. Kermasha, "Optimization of the Hydrolysis of Safflower Oil for the Production of Linoleic Acid, Used as Fla-  
671 vor Precursor," *Int. J. Food Sci.*, vol. 2015, p. 594238, 2015, doi: 10.1155/2015/594238.
- 672 [79] E. d'Avila Cavalcanti-Oliveira, P. R. da Silva, A. P. Ramos, D. A. G. Aranda, and D. M. G. Freire, "Study of Soybean Oil Hydrolysis Cata-  
673 lyzed by *Thermomyces lanuginosus* Lipase and Its Application to Biodiesel Production via Hydroesterification," *Enzyme Res.*, vol. 2011,  
674 p. 618692, 2011, doi: 10.4061/2011/618692.
- 675 [80] N. Matuog, K. Li, and Y. Yan, "Immobilization of *Thermomyces lanuginosus* lipase on multi-walled carbon nanotubes and its applica-  
676 tion in the hydrolysis of fish oil," *Mater. Res. Express*, vol. 4, no. 12, p. 125402, 2017, doi: 10.1088/2053-1591/aa9d02.
- 677 [81] P. Mayser and S. Schulz, "Precipitation of free fatty acids generated by *Malassezia* – a possible explanation for the positive effects of  
678 lithium succinate in seborrhoeic dermatitis," *J. Eur. Acad. Dermatology Venereol.*, vol. 30, no. 8, pp. 1384–1389, Aug. 2016, doi:  
679 <https://doi.org/10.1111/jdv.13620>.
- 680 [82] S. Triana *et al.*, "Lipid Metabolic Versatility in *Malassezia* spp. Yeasts Studied through Metabolic Modeling," *Frontiers in Microbiology*  
681 , vol. 8, 2017, [Online]. Available: <https://www.frontiersin.org/articles/10.3389/fmicb.2017.01772>.
- 682 [83] Y. M. DeAngelis *et al.*, "Isolation and Expression of a *Malassezia globosa* Lipase Gene, LIP1," *J. Invest. Dermatol.*, vol. 127, no. 9, pp.  
683 2138–2146, 2007, doi: <https://doi.org/10.1038/sj.jid.5700844>.
- 684 [84] C. C. Uranga, J. Beld, A. Mrse, I. Córdova-Guerrero, M. D. Burkart, and R. Hernández-Martínez, "Fatty acid esters produced by *Lasiodip-  
685 lodia theobromae* function as growth regulators in tobacco seedlings," *Biochem. Biophys. Res. Commun.*, vol. 472, no. 2, pp. 339–345,  
686 2016, doi: <https://doi.org/10.1016/j.bbrc.2016.02.104>.
- 687 [85] M. M. Salvatore, A. Alves, and A. Andolfi, "Secondary Metabolites of *Lasiodiplodia theobromae*: Distribution, Chemical Diversity, Bio-  
688 activity, and Implications of Their Occurrence," *Toxins*, vol. 12, no. 7, 2020, doi: 10.3390/toxins12070457.
- 689 [86] C. C. Uranga, J. Beld, A. Mrse, I. Córdova-Guerrero, M. D. Burkart, and R. Hernández-Martínez, "Data from mass spectrometry, NMR  
690 spectra, GC–MS of fatty acid esters produced by *Lasiodiplodia theobromae*," *Data Br.*, vol. 8, pp. 31–39, 2016, doi:  
691 <https://doi.org/10.1016/j.dib.2016.05.003>.
- 692 [87] S. Raimondi *et al.*, "Longitudinal Survey of Fungi in the Human Gut: ITS Profiling, Phenotyping, and Colonization," *Frontiers in Micro-  
693 biology*, vol. 10, 2019, [Online]. Available: <https://www.frontiersin.org/articles/10.3389/fmicb.2019.01575>.
- 694 [88] J. A. Takahashi, B. V. R. Barbosa, B. de A. Martins, C. P. Guirlanda, and M. A. F. Moura, "Use of the Versatility of Fungal Metabolism to  
695 Meet Modern Demands for Healthy Aging, Functional Foods, and Sustainability," *Journal of Fungi*, vol. 6, no. 4, 2020, doi:  
696 10.3390/jof6040223.
- 697 [89] B. Sandstrom, N. Lyhne, J. I. Pedersen, A. Aro, I. Thorsdottir, and W. Becker, *Nordic nutrition: Recommendations 2012*, vol. 40, no. 4.

- 698 2012.
- 699 [90] S. J. Ott *et al.*, "Fungi and inflammatory bowel diseases: alterations of composition and diversity," *Scand J Gastroenterol*, vol. 43, 2008,  
700 doi: 10.1080/00365520801935434.
- 701 [91] A. Hot *et al.*, "Fungal Internal Carotid Artery Aneurysms: Successful Embolization of an Aspergillus-Associated Case and Review," *Clin.*  
702 *Infect. Dis.*, vol. 45, no. 12, pp. e156–e161, Dec. 2007, doi: 10.1086/523005.
- 703 [92] S. Rønnow Schacht *et al.*, "Investigating Risk of Suboptimal Macro and Micronutrient Intake and Their Determinants in Older Danish  
704 Adults with Specific Focus on Protein Intake—A Cross-Sectional Study," *Nutrients*, vol. 11, no. 4. 2019, doi: 10.3390/nu11040795.
- 705 [93] T. A. Auchtung *et al.*, "Investigating Colonization of the Healthy Adult Gastrointestinal Tract by Fungi," *mSphere*, vol. 3, no. 2, pp.  
706 e00092-18, Mar. 2018, doi: 10.1128/mSphere.00092-18.
- 707 [94] G. Dubois, C. Girard, F.-J. Lapointe, and B. J. Shapiro, "The Inuit gut microbiome is dynamic over time and shaped by traditional foods,"  
708 *Microbiome*, vol. 5, no. 1, p. 151, Nov. 2017, doi: 10.1186/s40168-017-0370-7.
- 709 [95] H. Bartolomaeus *et al.*, "Short-Chain Fatty Acid Propionate Protects From Hypertensive Cardiovascular Damage," *Circulation*, vol. 139,  
710 no. 11, pp. 1407–1421, Mar. 2019, doi: 10.1161/CIRCULATIONAHA.118.036652.
- 711 [96] J. Li *et al.*, "The fungal community and its interaction with the concentration of short-chain fatty acids in the faeces of Chenghua,  
712 Yorkshire and Tibetan pigs," *Microb. Biotechnol.*, vol. 13, no. 2, pp. 509–521, Mar. 2020, doi: [https://doi.org/10.1111/1751-](https://doi.org/10.1111/1751-7915.13507)  
713 7915.13507.
- 714 [97] D. Maciejewska *et al.*, "The short chain fatty acids and lipopolysaccharides status in sprague-dawley rats fed with high-fat and high-  
715 cholesterol diet," *J. Physiol. Pharmacol.*, vol. 69, no. 2, pp. 205–210, 2018, doi: 10.26402/jpp.2018.2.05.
- 716 [98] S. Deleu, K. Machiels, J. Raes, K. Verbeke, and S. Vermeire, "Short chain fatty acids and its producing organisms: An overlooked ther-  
717 apy for IBD?," *eBioMedicine*, vol. 66, Apr. 2021, doi: 10.1016/j.ebiom.2021.103293.
- 718

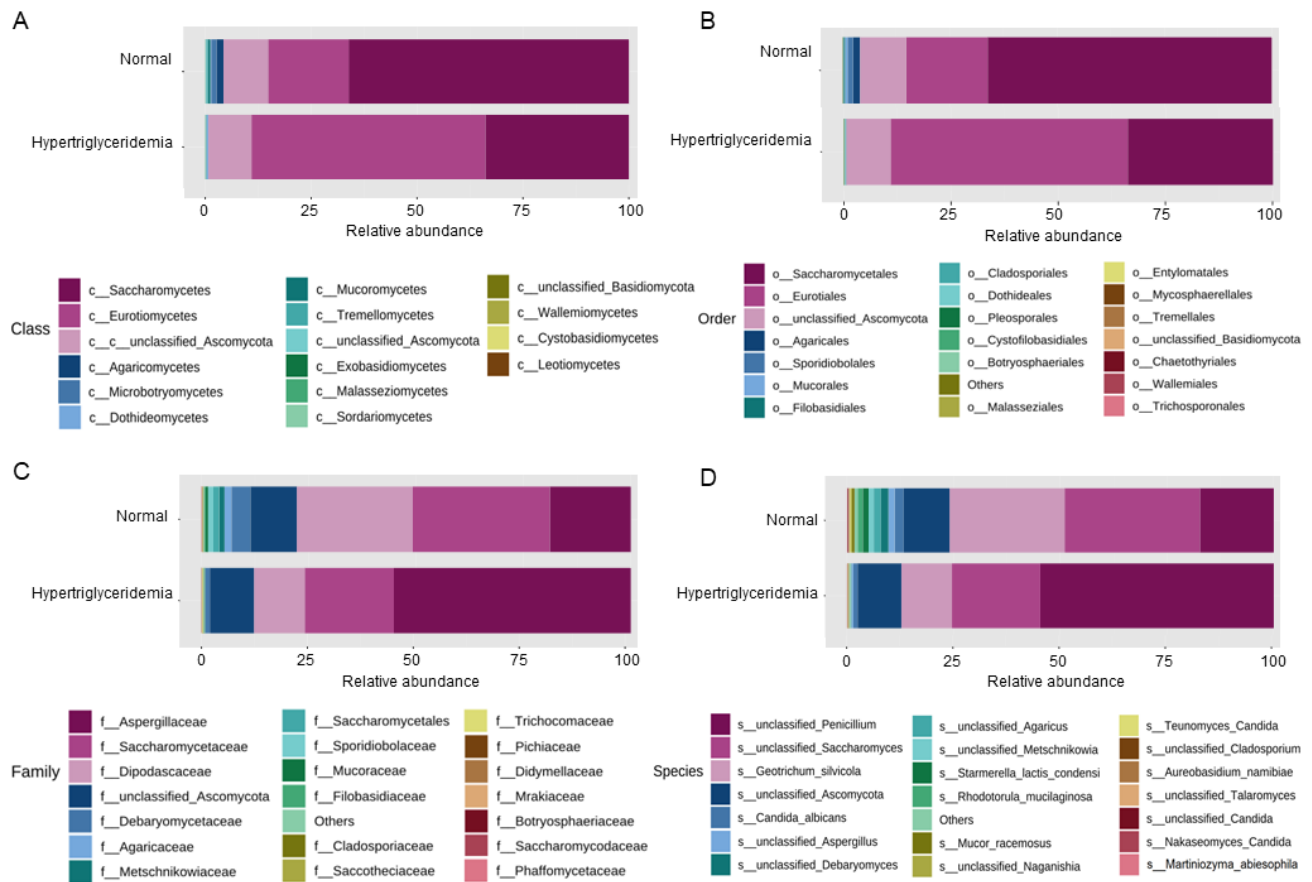

719

720 **Fig. S1** Taxonomy summary of the fungal communities associated with Tg levels. The diagrams depicted the percent-  
 721 age abundances of fungi at the (A) class; (B) order; (C) family; and (D) species levels in merged samples. Only the top  
 722 20 features are shown at the taxonomy level, with the remainder classified in Others.

723

724

725

726

727

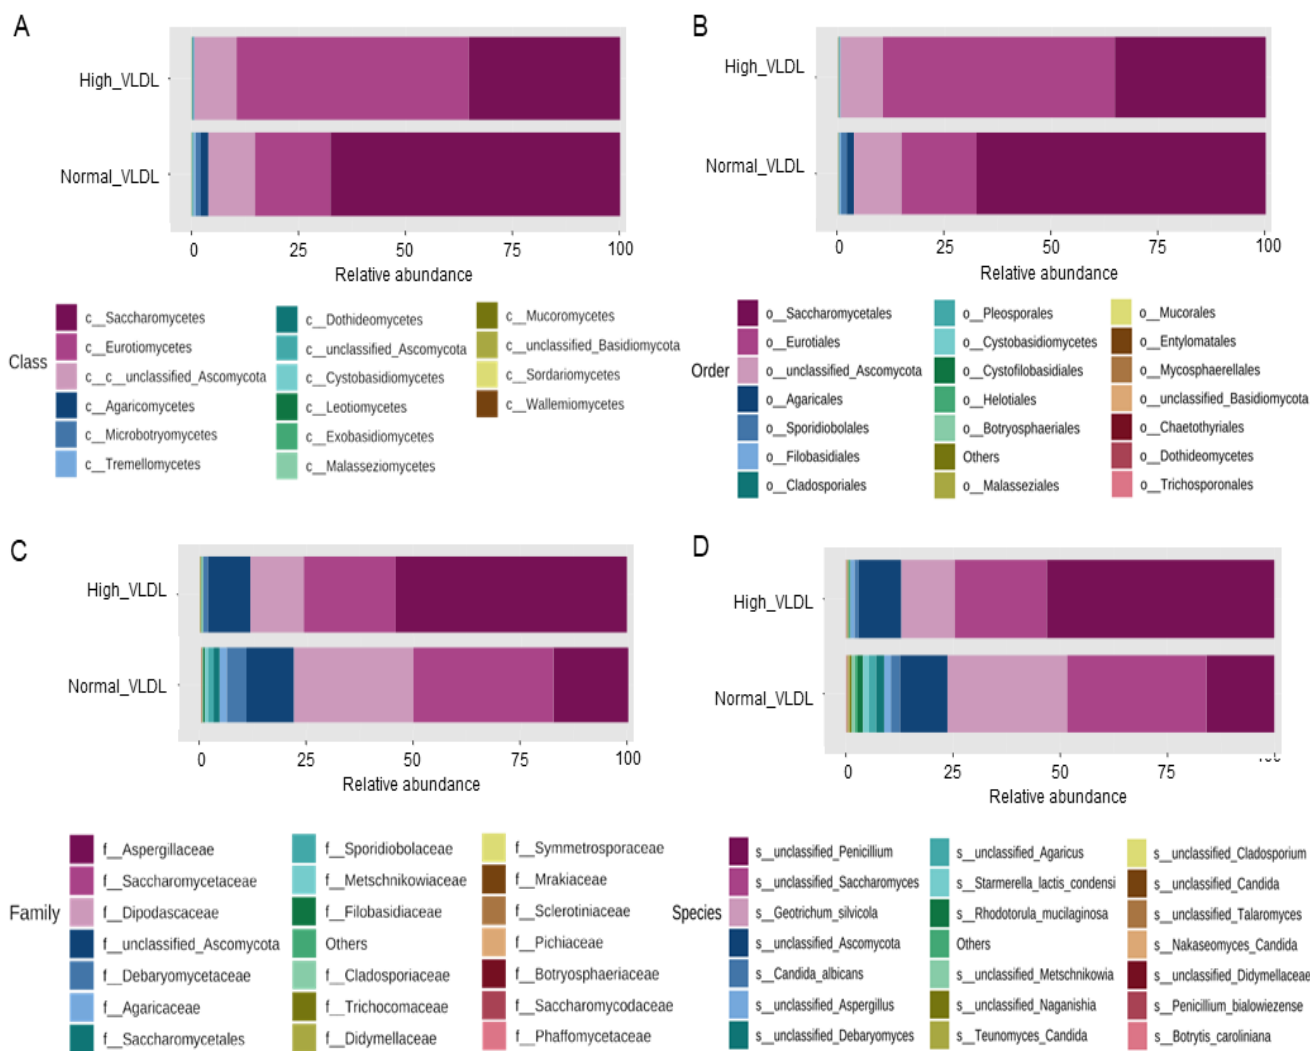

728

729 **Fig. S2** Taxonomy summary of the fungal communities associated with VLDL levels. The diagrams depicted the per-  
 730 centage abundances of fungi at the (A) class; (B) order; (C) family; and (D) species levels in merged samples. Only the  
 731 top 20 features are shown at the taxonomy level, with the remainder classified in Others.

732

733

734

735

736

737

738

739  
740  
741  
742  
743  
744

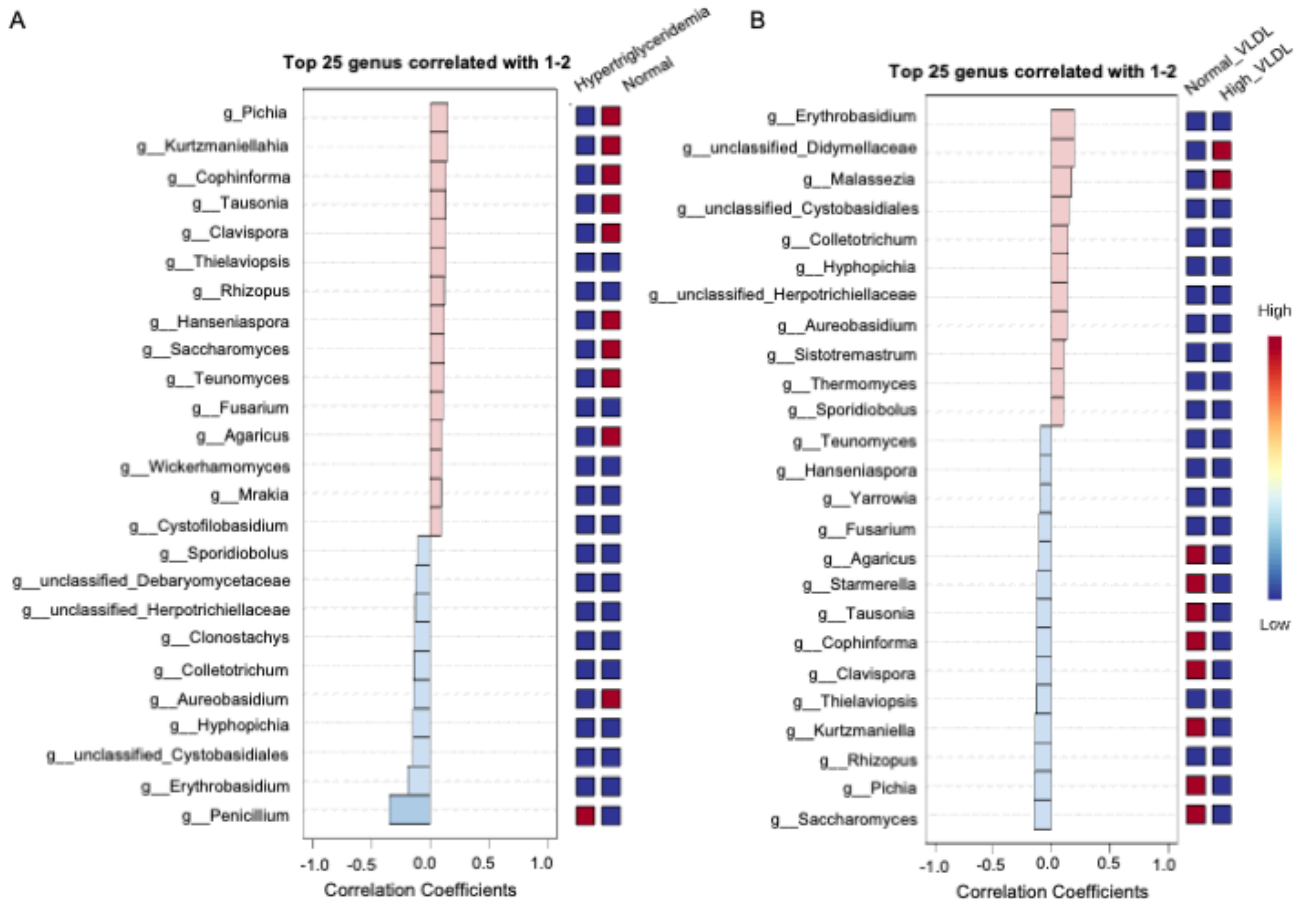

745

746 **Figure S3:** Clustering pattern of the gut mycobiome. A) The barplot illustrated the distribution pattern of identified  
747 mycobiota in the elderly Danes' fecal samples based on the A) Tg levels; and B) VLDL levels.

748

749

750

751

752

753

754

755

756

757

758

759

760

761

762

763

764

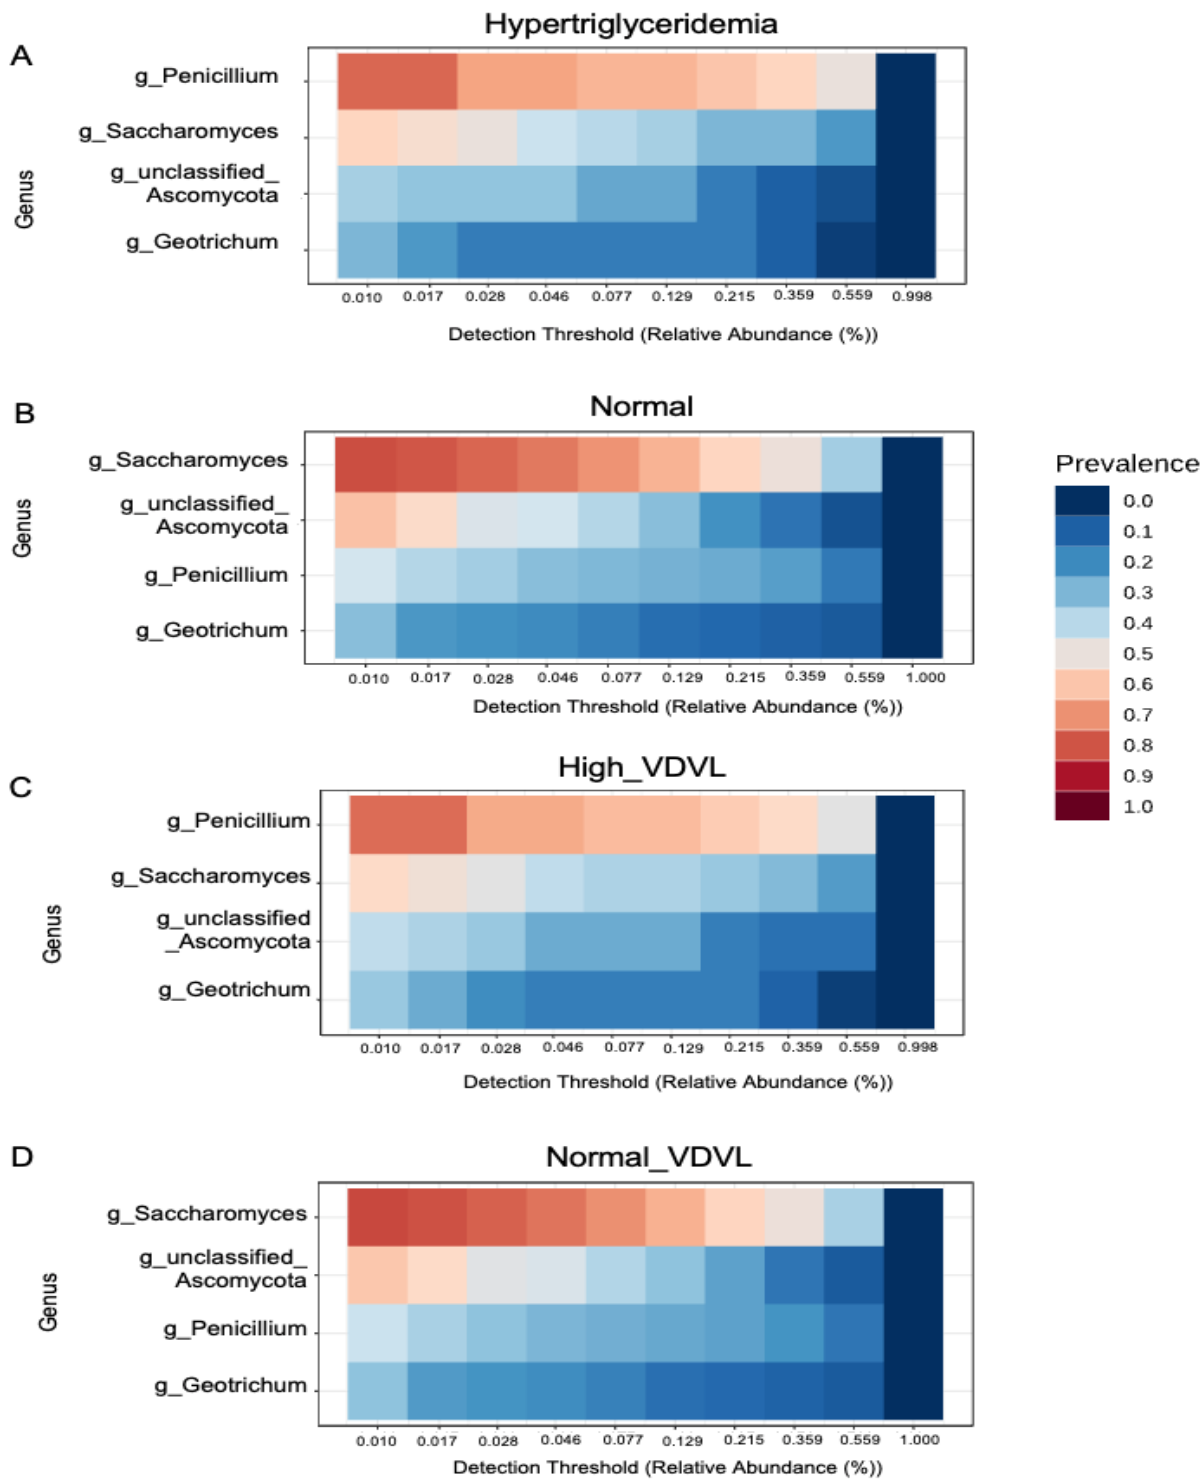

765  
766 **Figure S4:** Comparison of core mycobiota at Tg and VLDL levels. The heatmaps displayed distribution of core  
767 mycobiota in sample (A) Hypertriglyceridemia; (B) Normal Tg levels; and (C) High; (D) Normal VLDL levels.



A

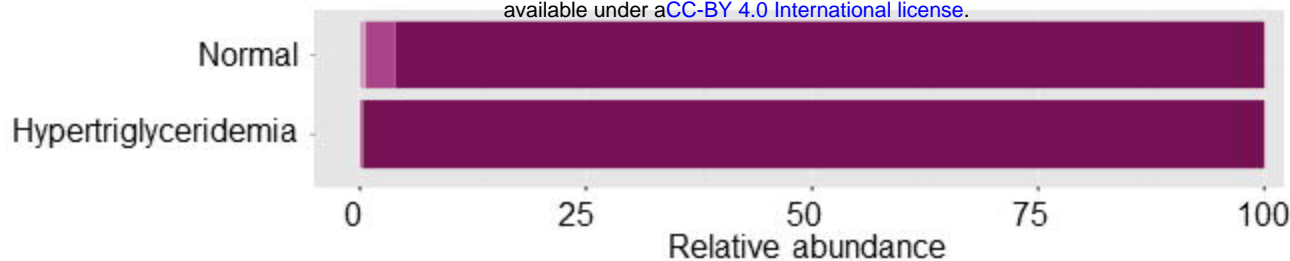

B

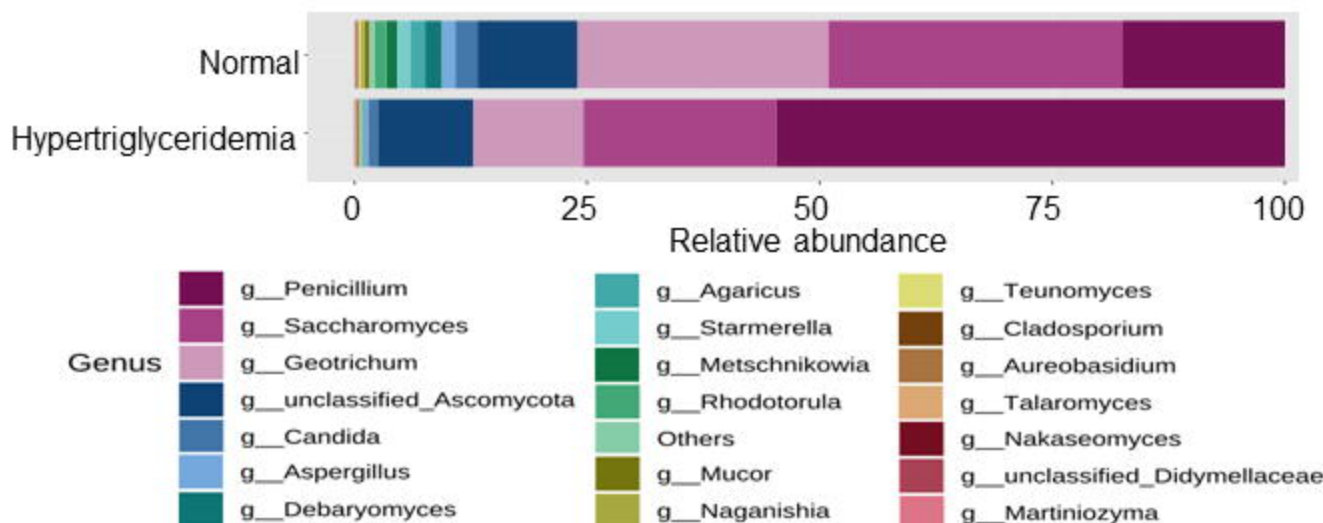

C

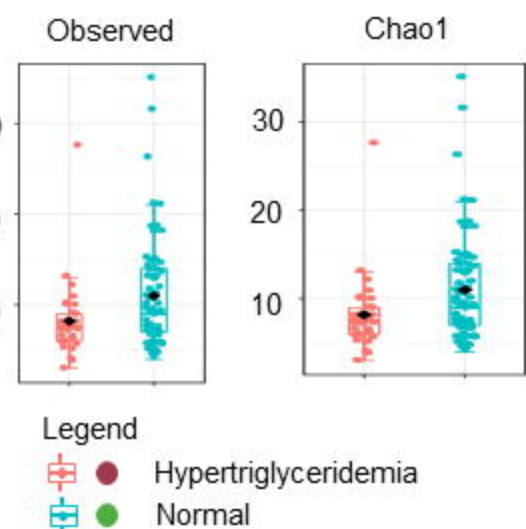

D

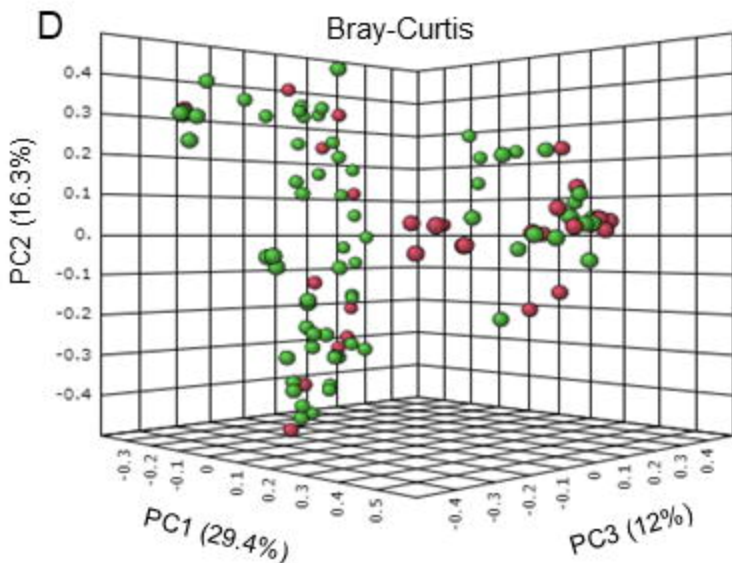

E

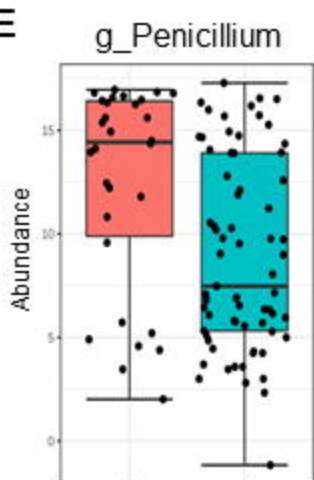

F

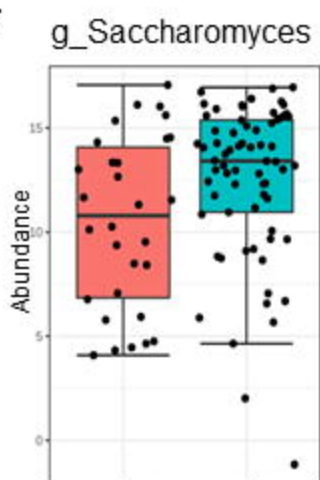

g\_Pichia

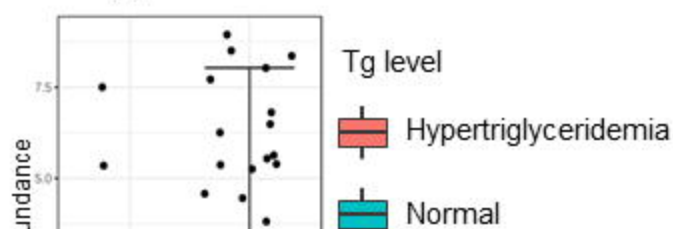

A

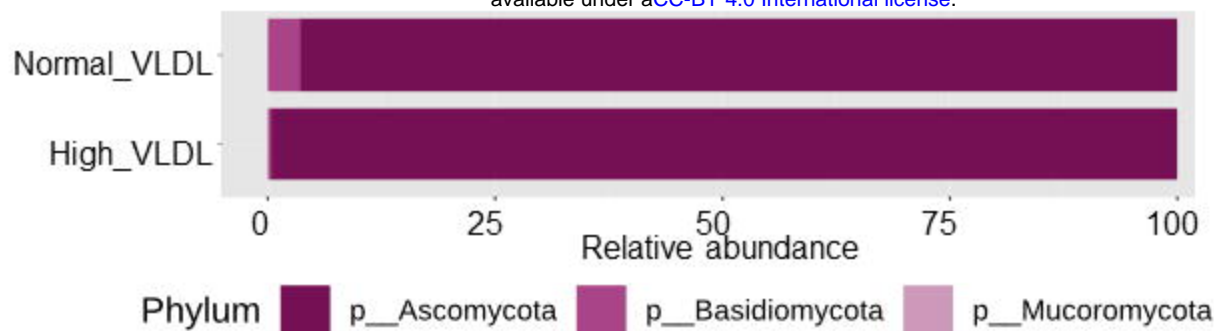

B

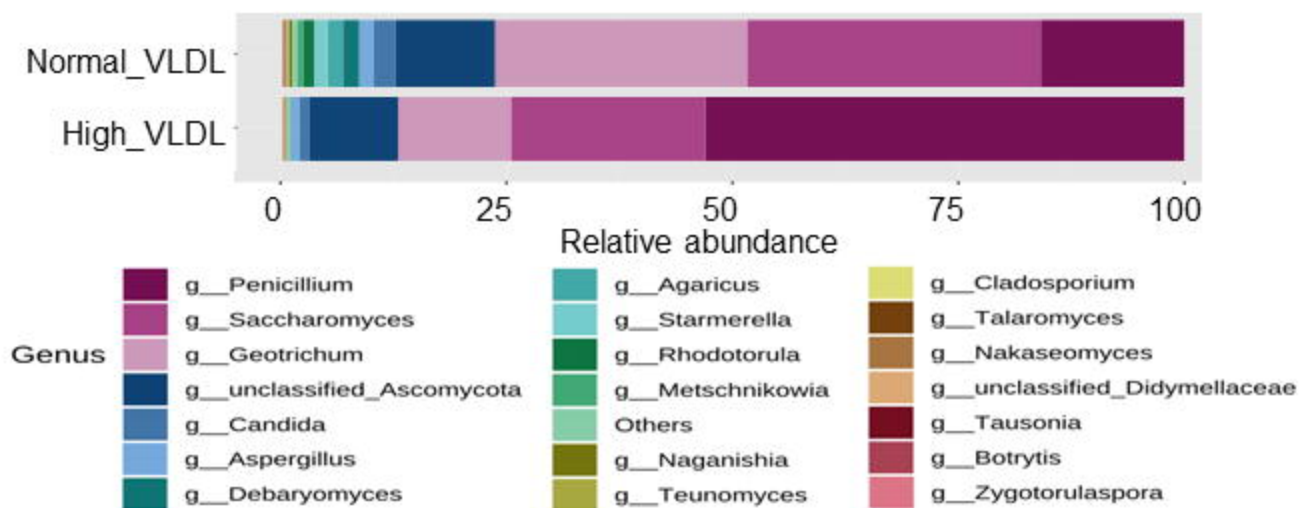

C

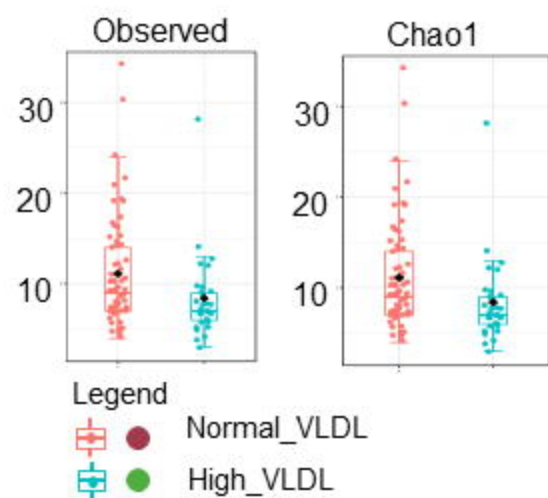

D

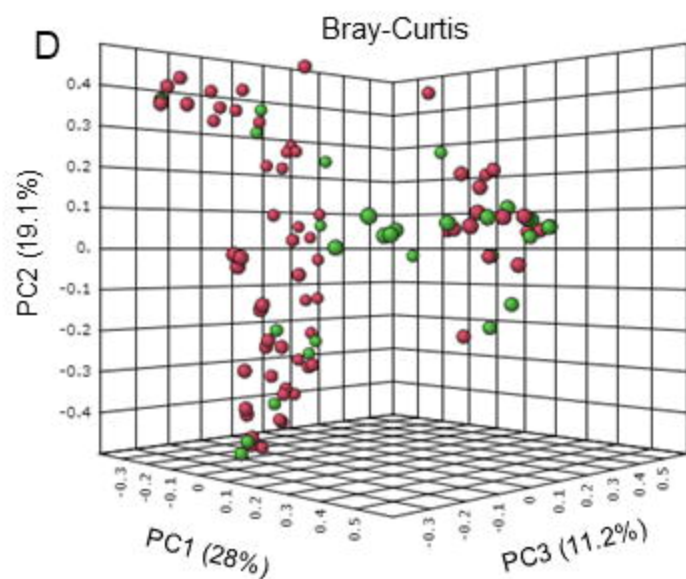

E

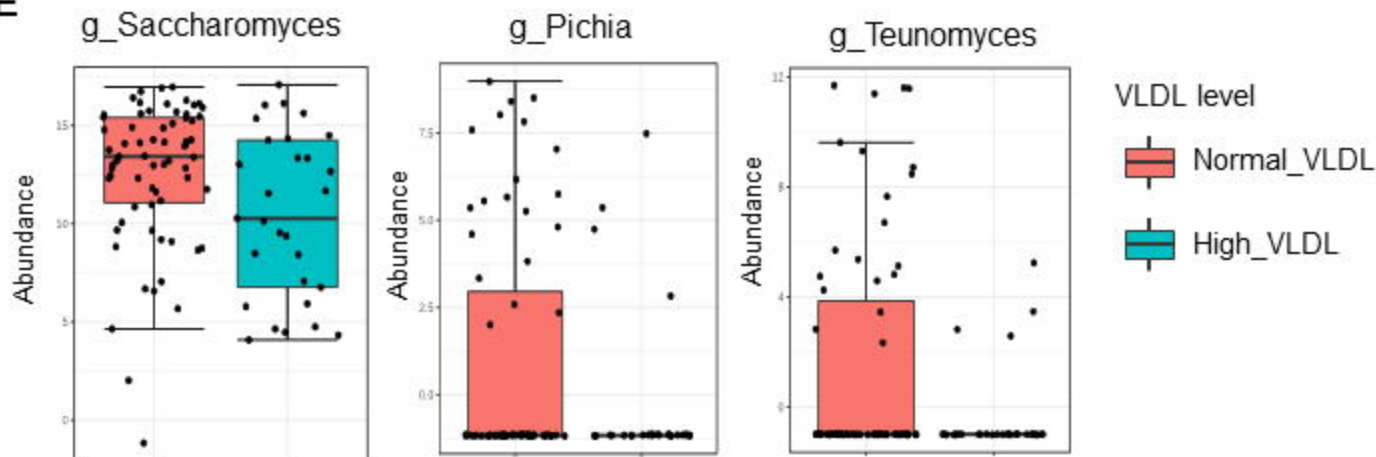

A

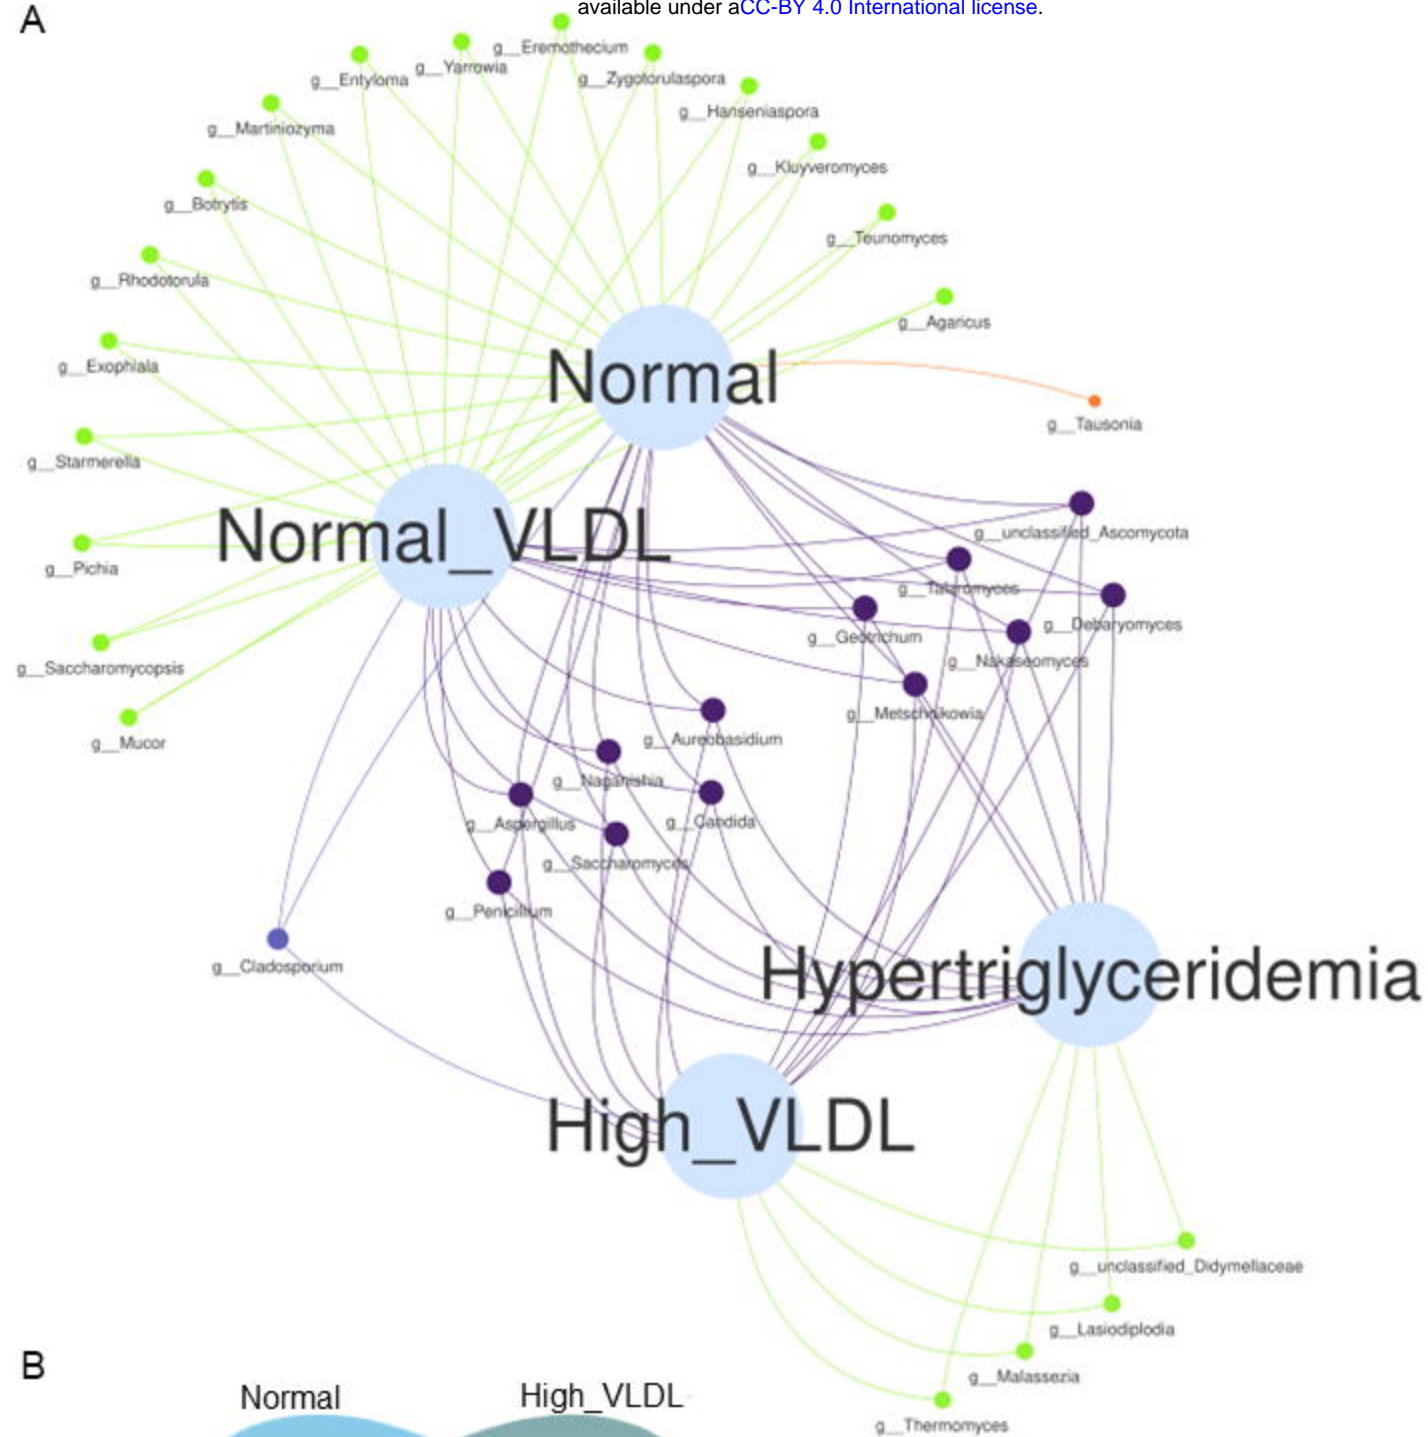

B

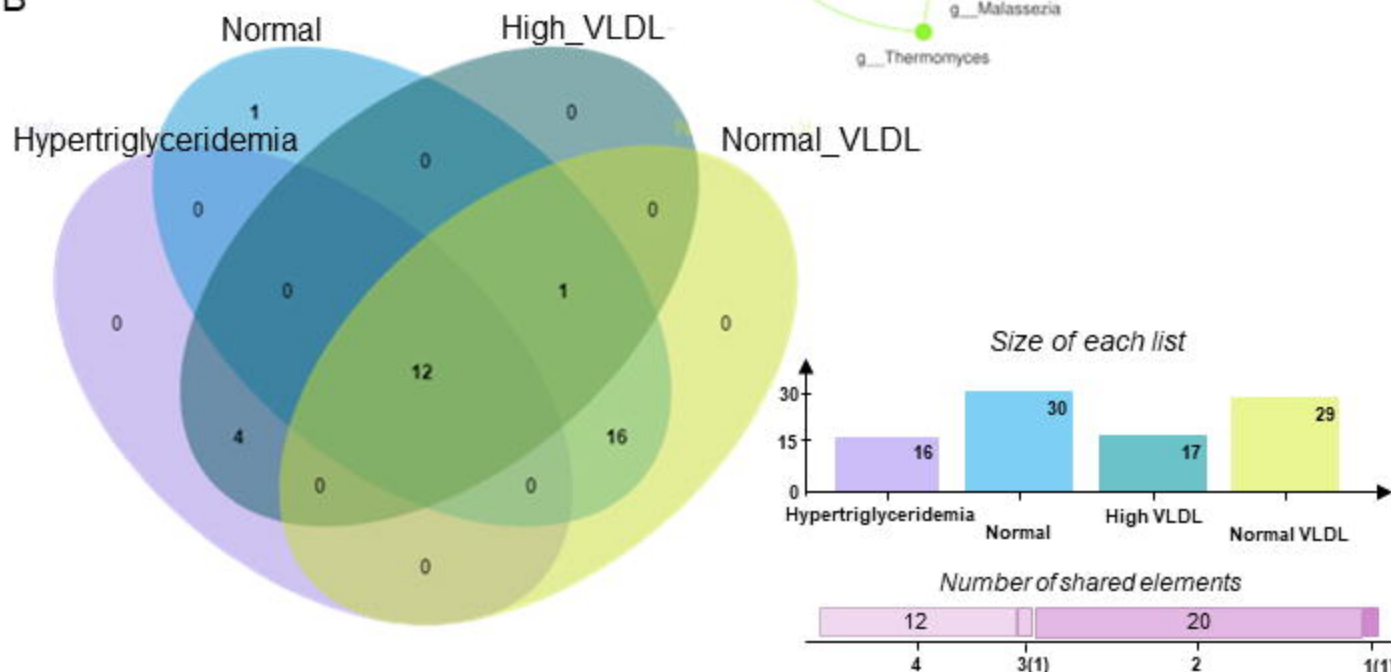



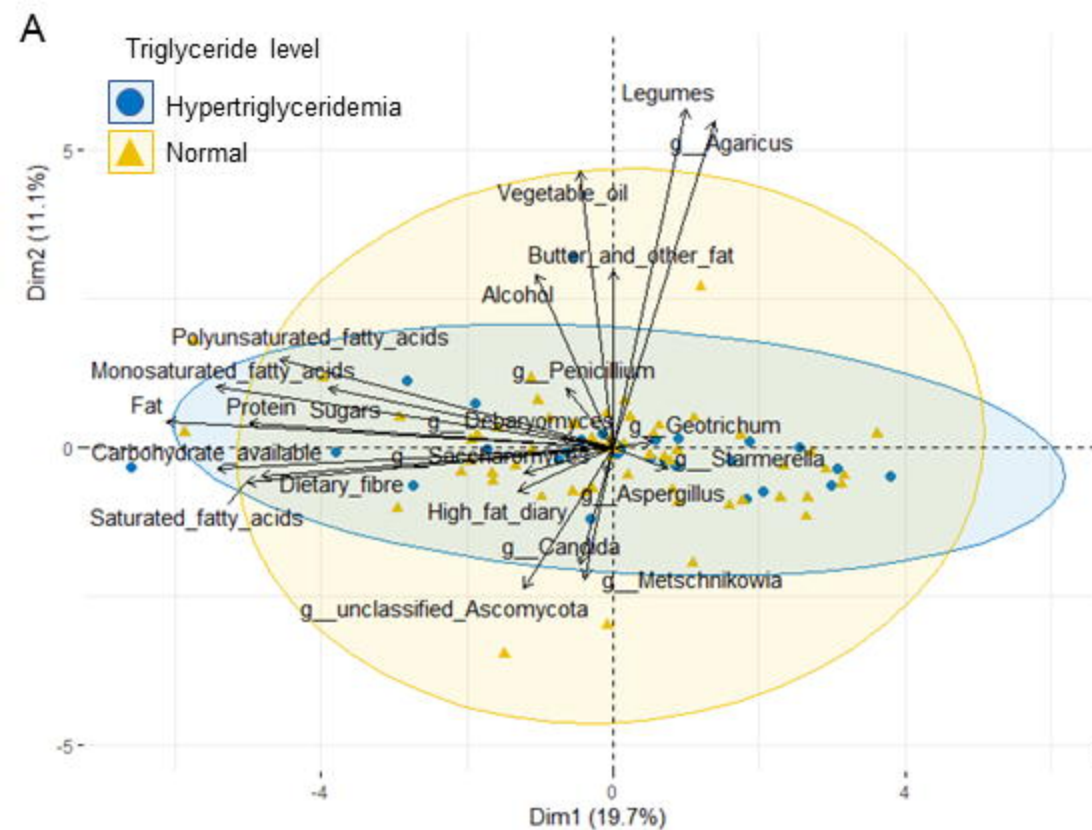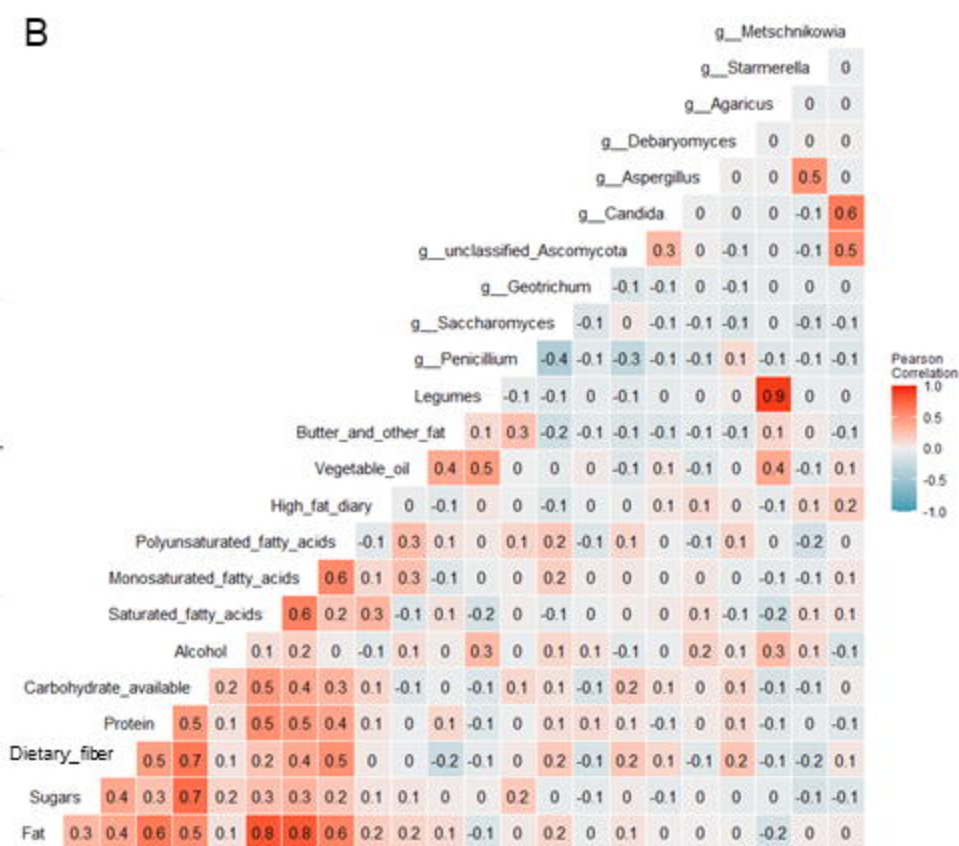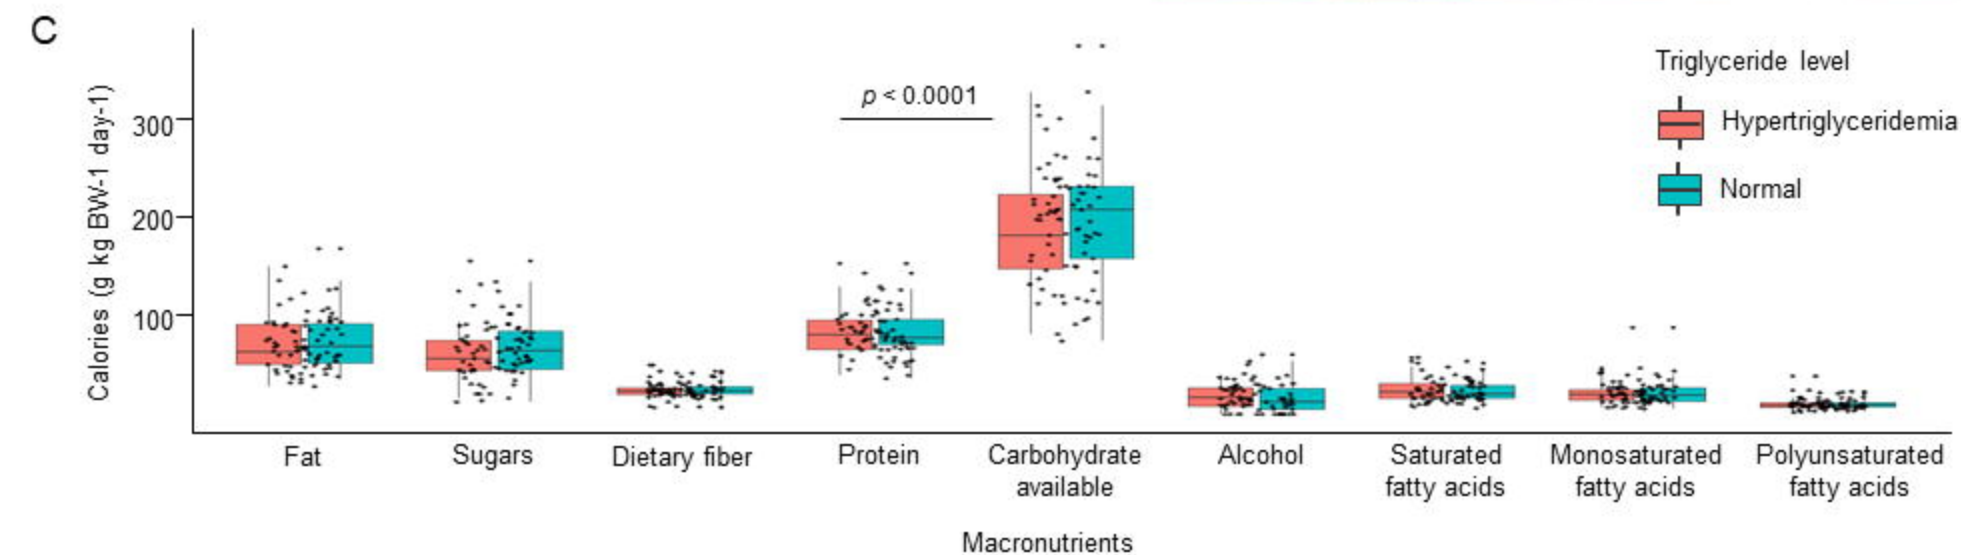

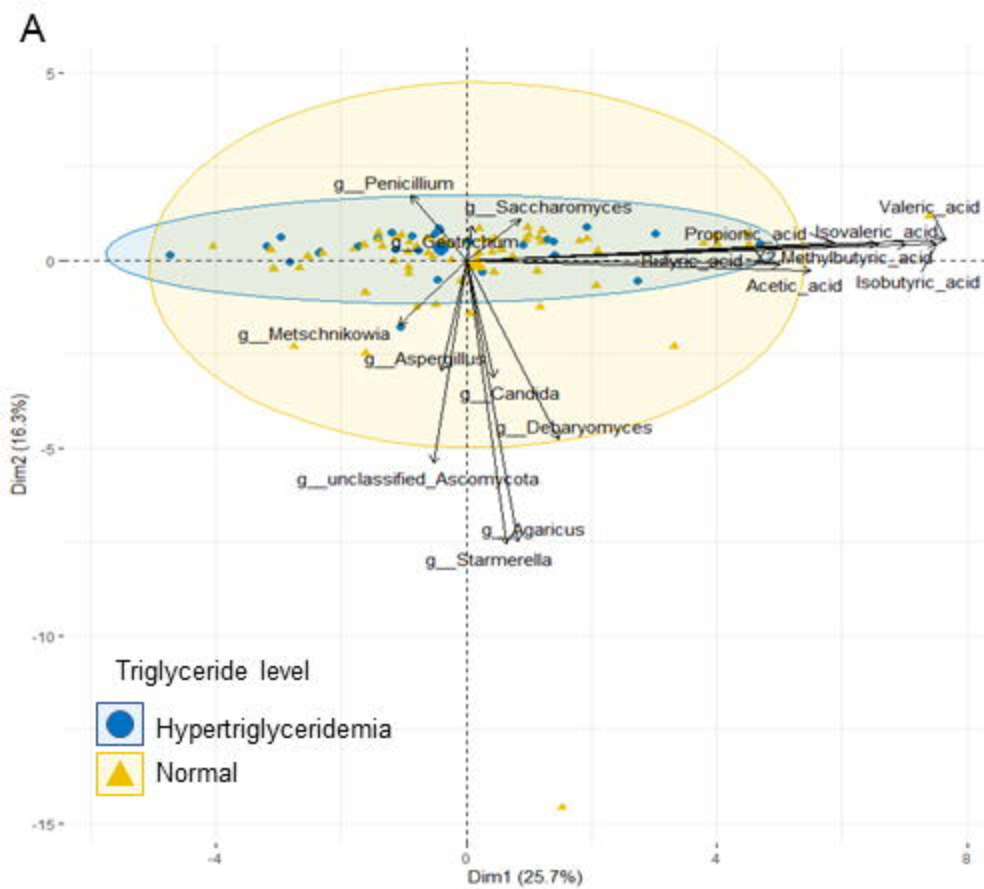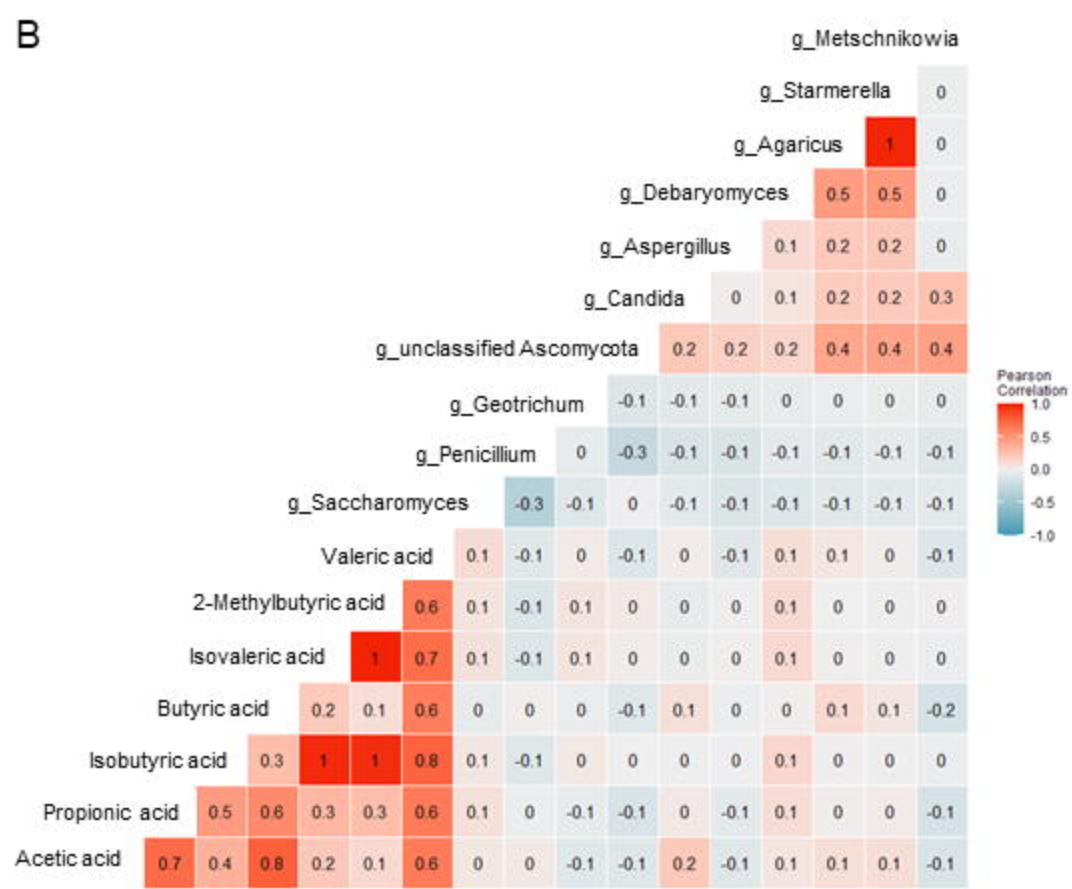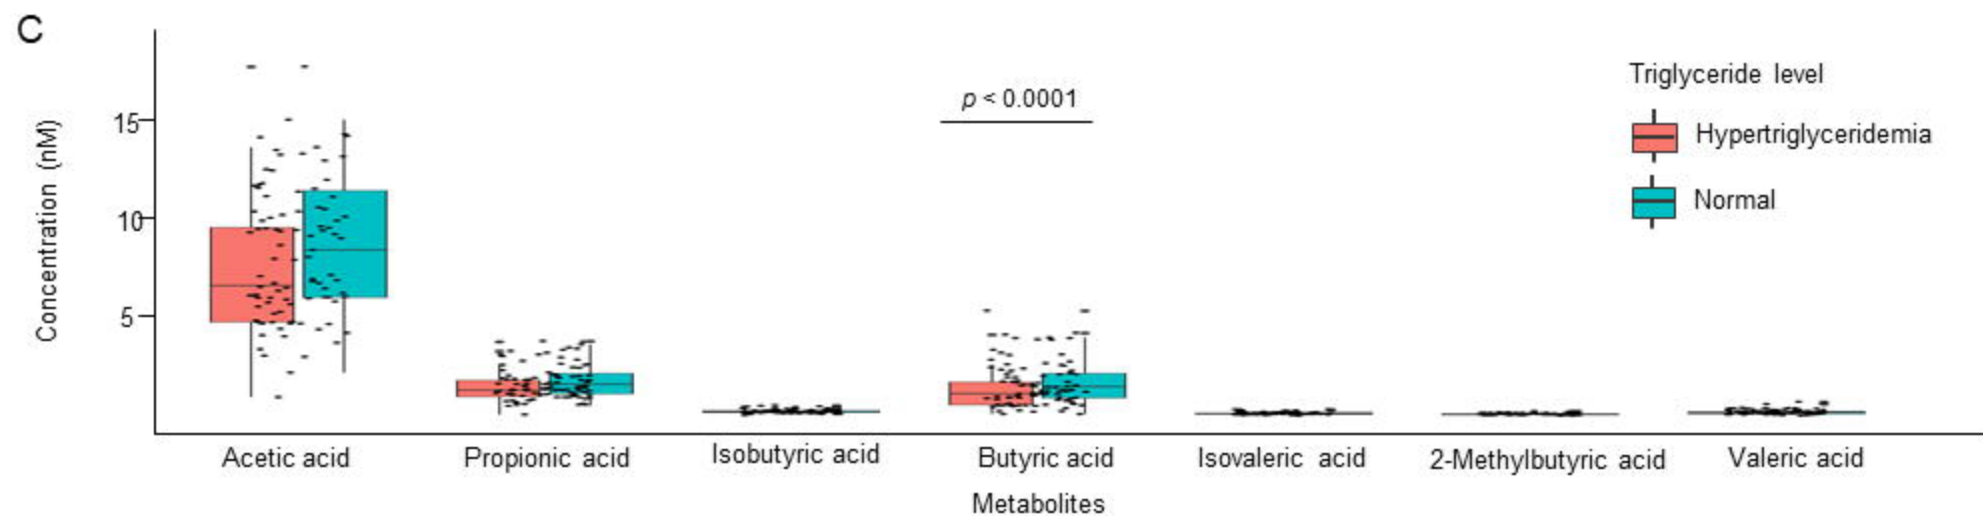

A

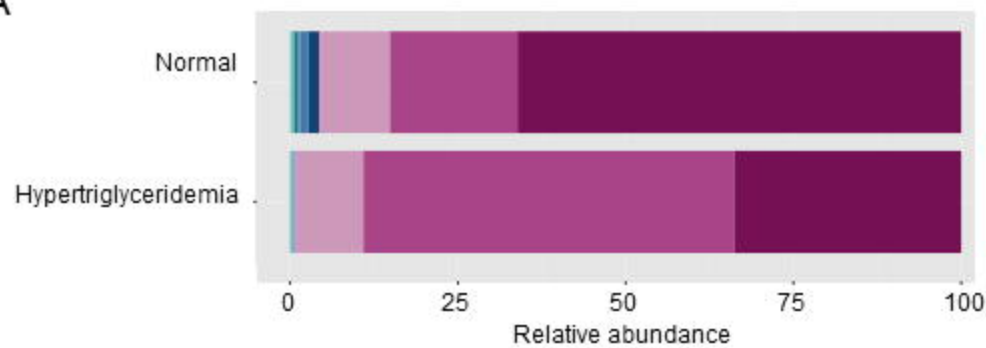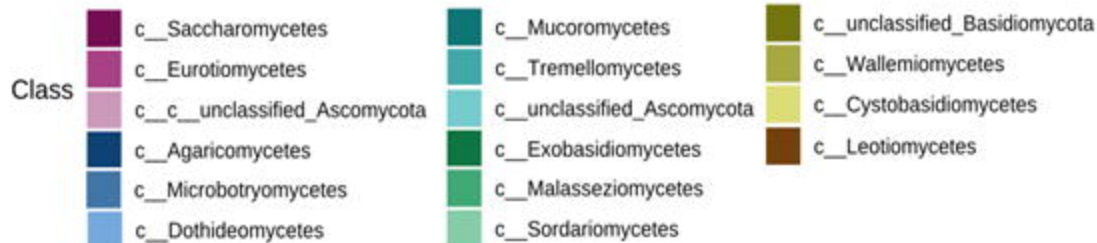

B

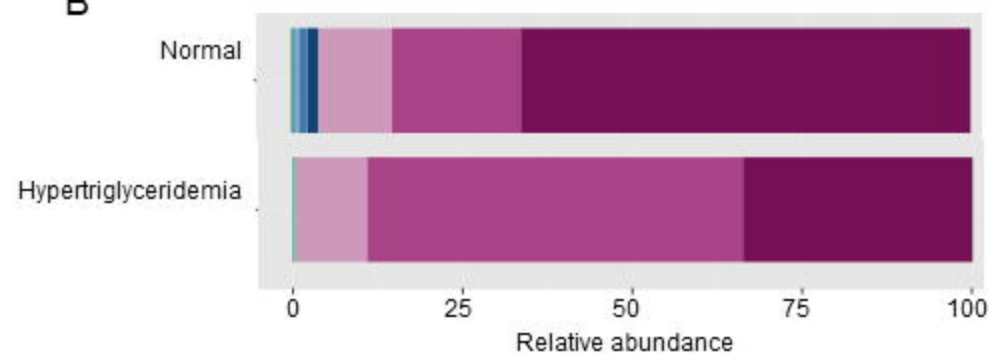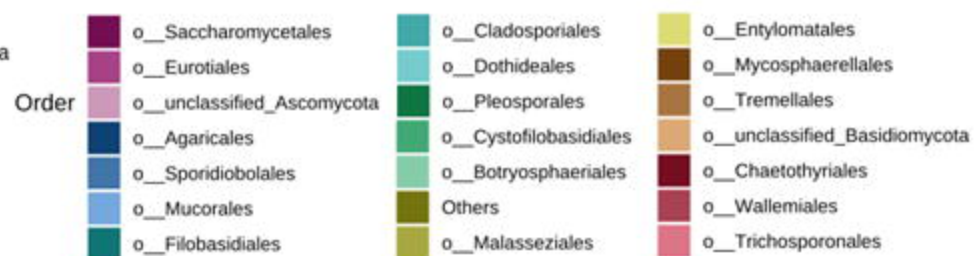

C

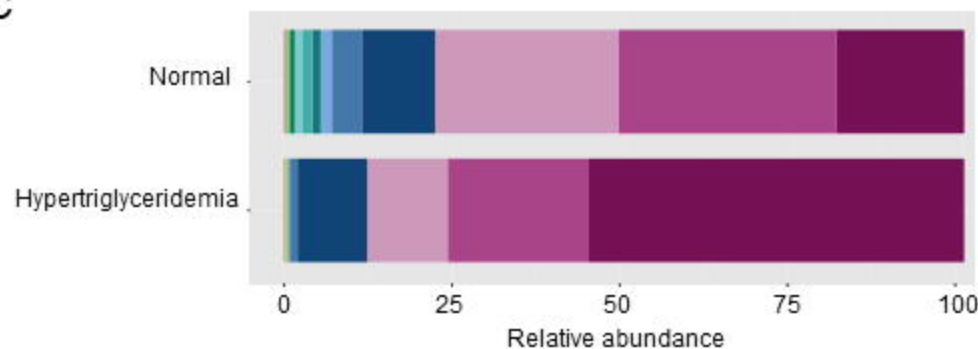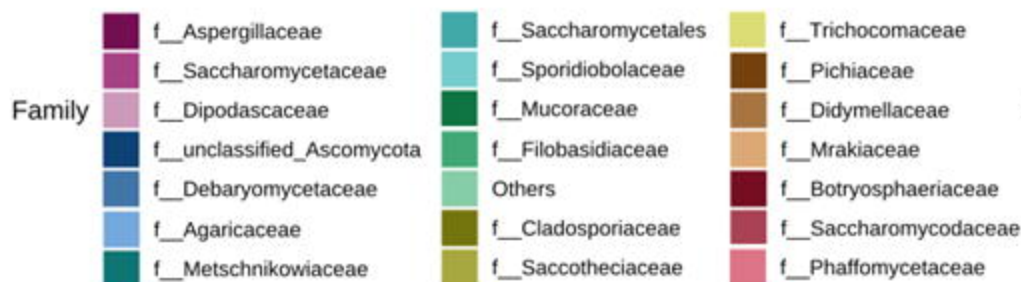

D

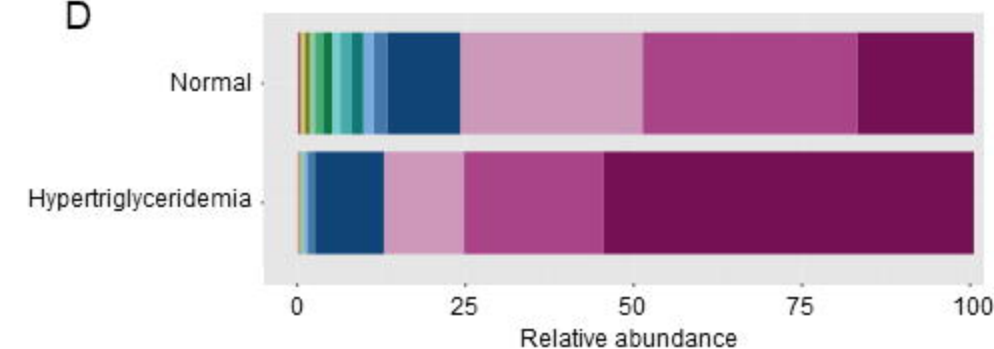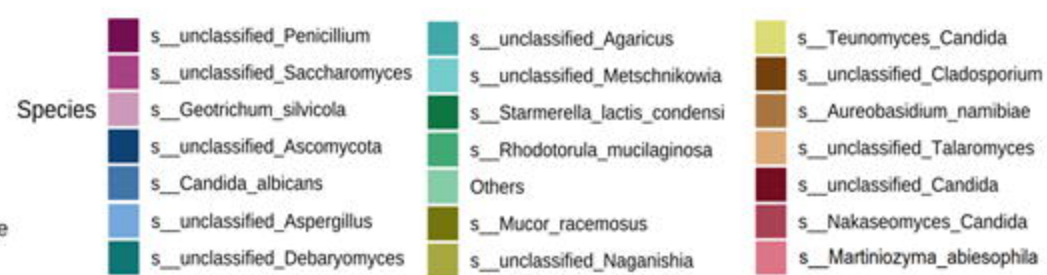



A

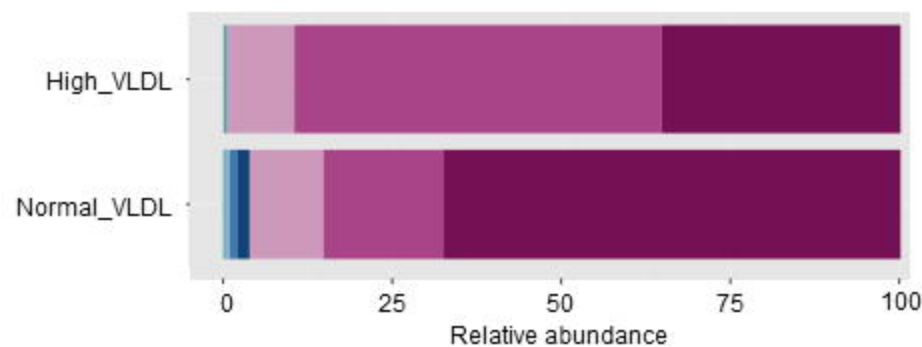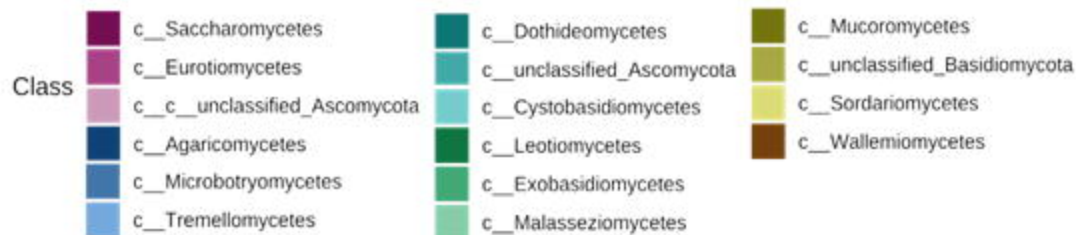

B

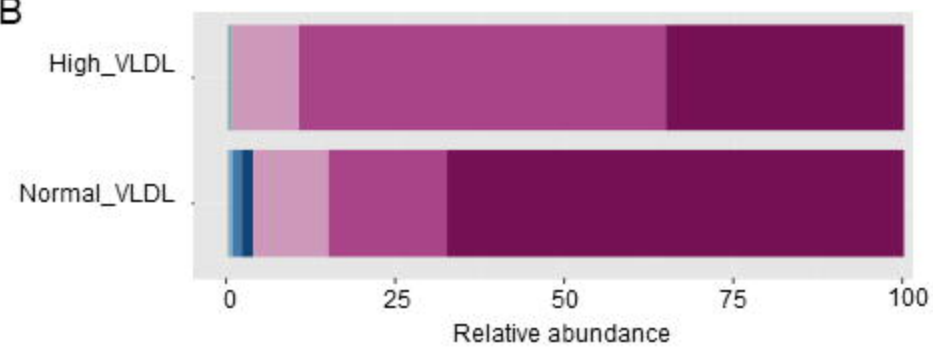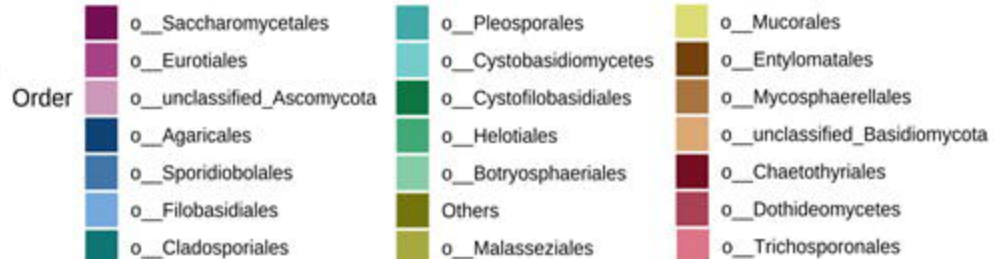

C

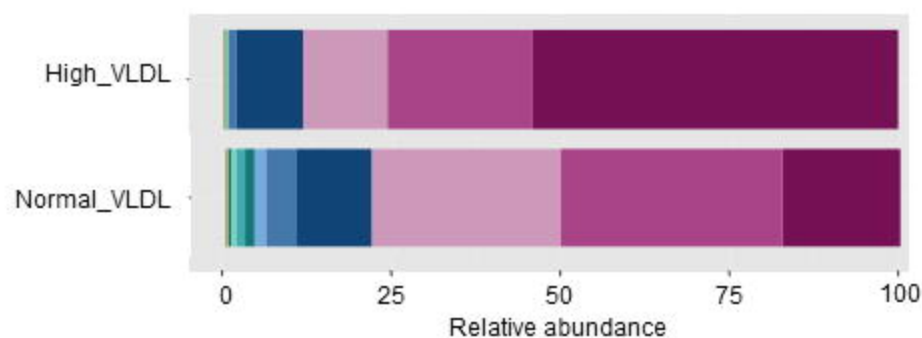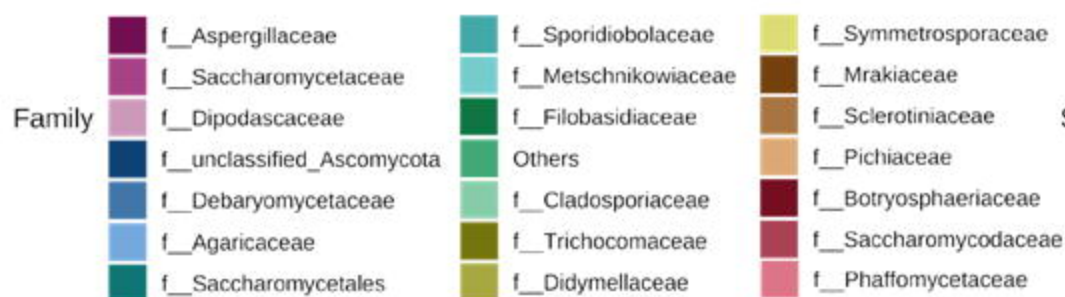

D

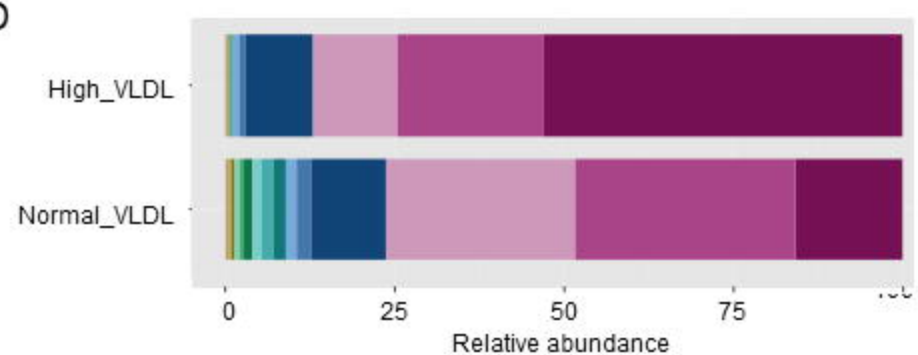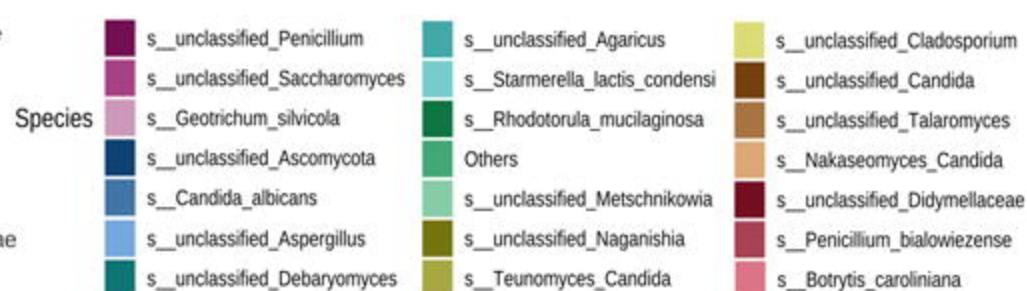

A

## Top 25 genus correlated with 1-2

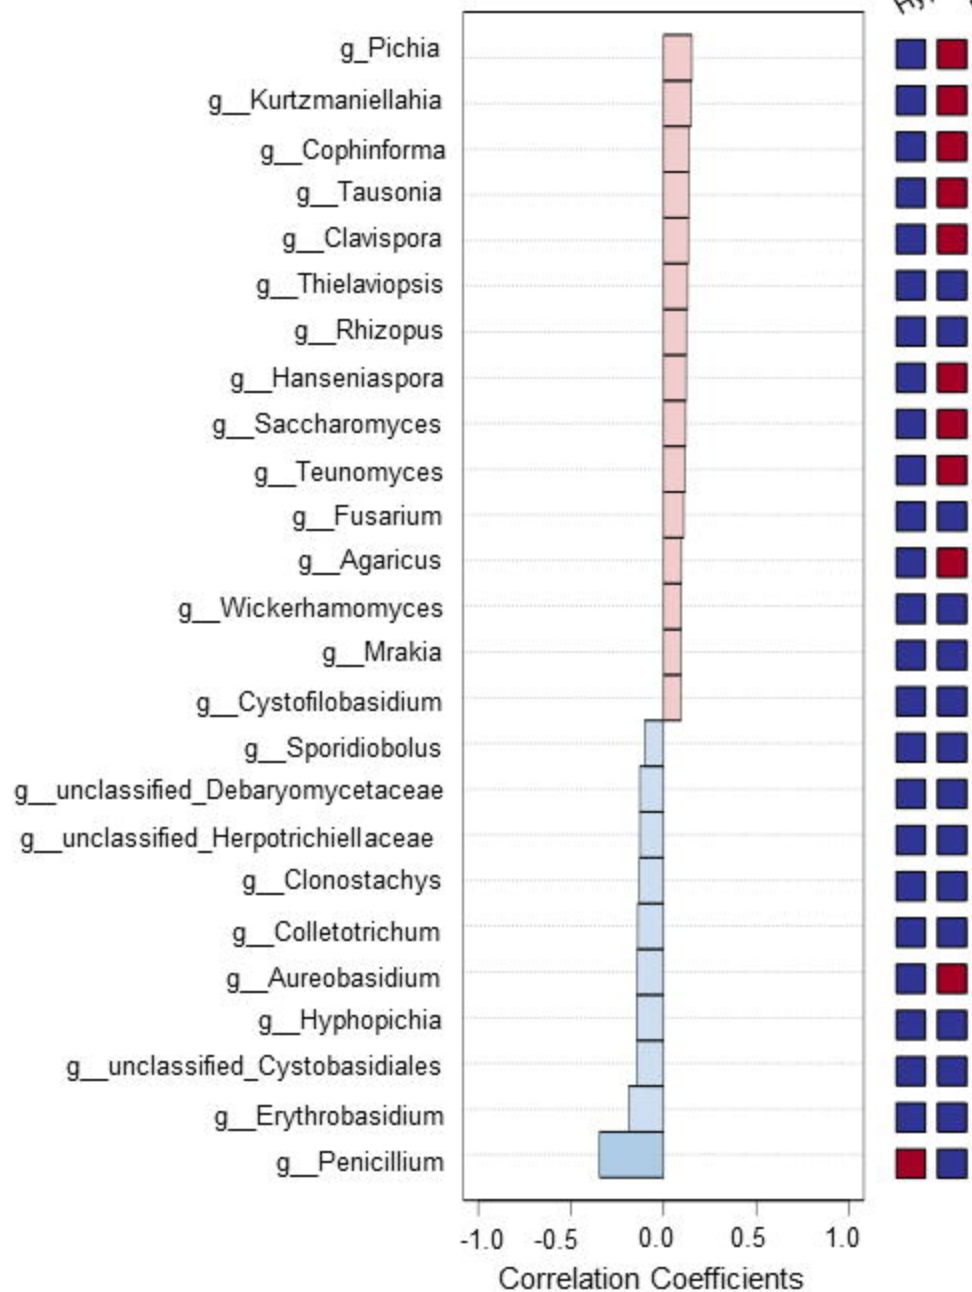

B

## Top 25 genus correlated with 1-2

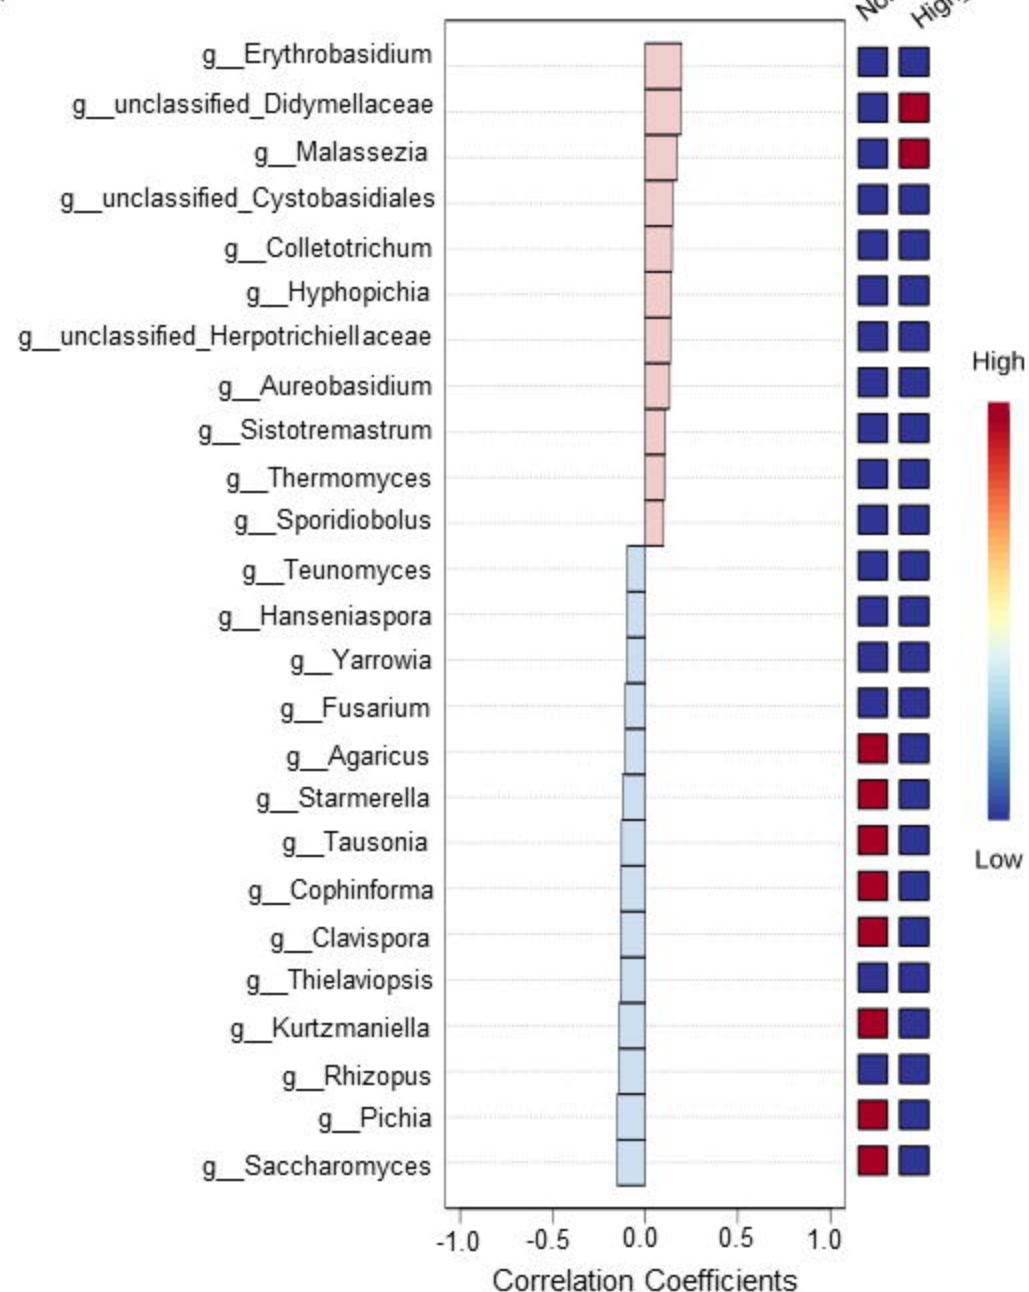



A

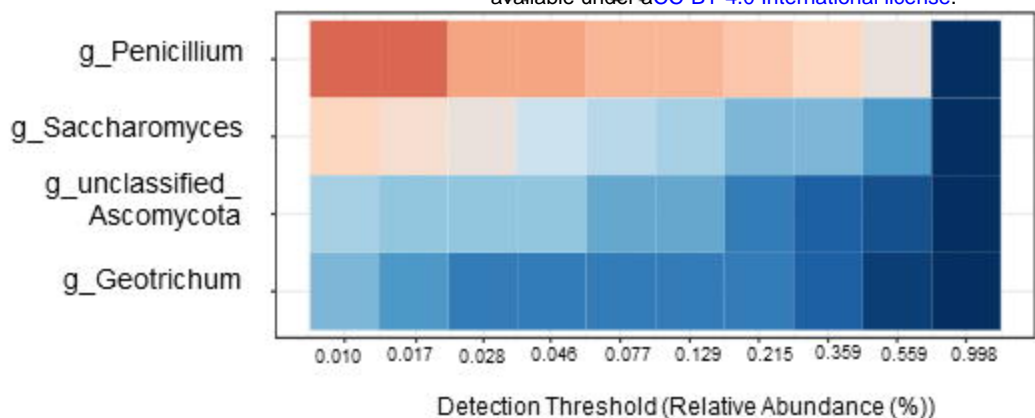

B

Normal

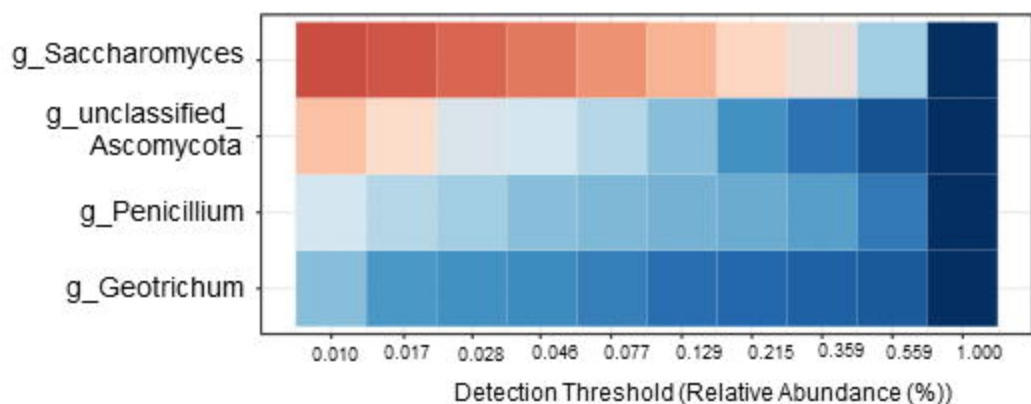

Prevalence

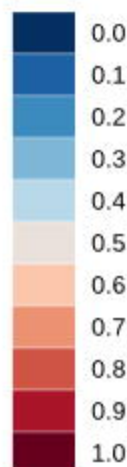

C

High\_VDVL

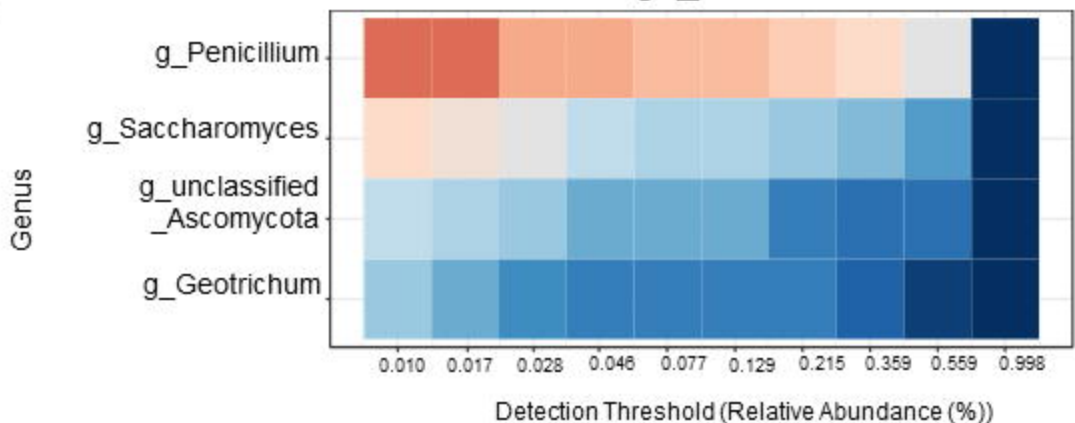

D

Normal\_VDVL

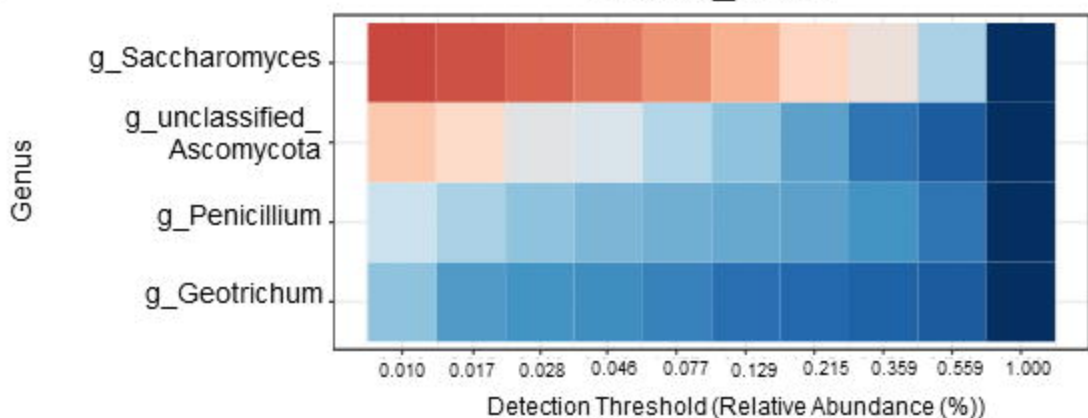

Source: https://www.biorxiv.org/content/10.1101/2020.04.16.044693v2.full.pdf
